# Supplementary material for: Estimating the Global Prevalence of Inadequate Zinc Intake from National Food Balance Sheets: Effects of Methodological Assumptions
Source: PLoS One. 2012 Nov 29;7(11):e50565. doi: 10.1371/journal.pone.0050565 (PMC3510064; doi:10.1371/journal.pone.0050565)
Supplement: Table S1 — Nutrient composition data for standardized food commodities, as defined by the Food and Agriculture Organization of the United Nations and obtained from different nutrient composition databases. Individual foods were aggregated into standardized food commodities and weighting factors were applied based on the number of foods defined for each commodity. The zinc and phytate contents of the individual foods are provided, as appropriate, for the USDA Nutrient Database for Standard Reference, Release 23 (USDA SR23), Nutrition Data System for Research (NDSR), WorldFood System International Mini-list (IML) and composite database created for the purposes of this analysis. (XLS) [file pone.0050565.s001.xls]

## Sheet: Nutrient Databases
	FAO FBS Data			USDA Nutrient Database for Standard Reference, Release 23					Nutrient Data System for Research (NDSR)								WorldFood System International Mini-list (IML)							Composite Nutrient Database										Supplemental Information		Additional Literature Values
FAO FBS Food Commodity	FAO FBS Definition	Item FAO Code		USDA Number	USDA Name	USDA kcal	USDA Zinc		NDSR Foodid	NDSR Name	NDSR kcal	NDSR Zinc	NDSR Phytate	NDSR P_Zn molar ratio	Weight		IML Number	IML Name	IML kcal	IML Zinc	IML Phytate	IML P_Zn molar ratio		Composite database nutrient source Zn/Phytate	Name	Kcal	Zinc	Phytate	Phyt_Reddy	Phyt_Phillippy	P_Zn molar ratio	Weight		Notes on Calculation of Zinc Values and creation of composite food composition database	Notes on Calculation of Phytate Values and creation of composite food composition database	Additional Literature Values for Zinc	Additional Literature Values for Phytate
Wheat, white flour	Default composition: 15 Wheat, 16 Flour of Wheat, 18 Macaroni, 20 Bread, 21 Bulgur, 22 Pastry, 23 Starch of Wheat, 41 Breakfast Cereals, 110 Wafers; nutrient data only: 17 Bran of Wheat, 19 Germ of Wheat, 24 Gluten of Wheat, 114 Mixes and Doughs, 115 Food Prep,Flour,Malt Extract	2511		20081	WHEAT FLR,WHITE,ALL-PURPOSE,ENR,BLEACHED	364	0.7		29484	ingredient, flour, white all-purpose, unenriched	364	0.7	83	11.7494			7300	WHEAT, FLOUR, 70-75% EXTRACTION	364	0.7	282	39.9195		USDA 20081/IML	WHEAT, FLOUR, 72% EXTRACTION	364	0.7	282	282		39.9195			USDA, IML and NDSR all agree; used USDA value	No phytate value for wheat flour, white (70-75% extraction) in Reddy 2002; IML phytate value from Oberleas & Harland, 1981 ; (www.fao.org/infoods/software/wfood2.rtf , p. 143); NSDR source unknown; used IML value		Rosado, J Nutr 2008: 80% extraction, Phytate= 340 mg /100g; Febles, J Cer Sci 2002: "refined", Phytate= 296mg/100g; Garcia-Estepa, Food Research International 1999: white baking flour, Phytate = 298 mg/100g; Le Francois, J Food Comp Anal 1988: flour type 55, Phytate = 155mg/100g; Franz, J Nutr 1980: white flour, Phytate = 40mg/100g DM; Phytate = 154mg - 320 mg (Graf and Dintzis, 1982, Harland 199…
Wheat, whole wheat flour				20080	Wheat flour, whole grain	340	2.6		1822	ingredient, flour, whole wheat, used in recipes not containing yeast	339	2.93	745	25.1955	1		7310	Wheat, flour, whole grain	339	2.9	845	28.873		USDA 20080/Reddy 2002	Wheat, flour, whole grain	340	2.6	777	870		29.6129	1		Wheat flour, whole grain (USDA 20080) = 2.6mg/100g (340 kcal); Lower than Zn content of both IML and NDSR (=2.9mg/100g); IML references this same USDA number, but gives Zn value for whole grain wheat (not flour) (www.fao.org/infoods/software/wfood2.rtf , p. 143); assume that all wheat is consumed as flour and used the USDA Zn value	Midpoint of Reddy 2002 value for wheat (range = 390 to 1350mg/100g =870 *0.8925 DM = 777mg/100g fresh weight); IML from Oberleas & Harland 1981 (www.fao.org/infoods/software/wfood2.rtf , p. 143); NSDR source unknown; used Reddy 2002 midpoint value		Good (ETH dissertation, Souci, Food Composition Tables, Bonn/Berlin),Phytate= 878mg/100g; Rosado, J Nutr 2008, Phytate = 890mg/100g (Zn 2.4 mg); Febles, J Cer Sci 2002, Phytate = 850mg/100g; Le Francois, J Food Comp Anal 1988, Phytate =814mg/100g; Frossard, J Sci Food Agric 2000, reports similar values to Reddy et al.1989 as dry matter (DM)
Barley	Default composition: 44 Barley, 45 Pot Barley, 46 Barley Pearled, 49 Malt, 50 Malt Extract; nutrient data only: 47 Bran of Barley, 48 Barley Flour and Grits	2513		20130	Barley, flour or meal	345	2		32941	ingredient, flour, barley	345	2	555	27.4977	1		8108	Barley, wholegrain, dry	354	2.8	875	30.9659		USDA 20004/Reddy 2002	Barley, wholegrain, dry	354	2.77	697	770		24.9337	1		Barley, whole grain, dry (USDA 20004) = 2.77mg/100g (354 kcal), matches value in IML; NDSR value was barley flour (matches USDA 20130), unable to determine if flour is from whole grain or pearled barley; used USDA 20004 value for whole grain	NDSR phytate is for barley flour, and IML phytate for hulled barley. Midpoint of Reddy 2002 value for barley (range = 380 to 1160mg/100g =770 *0.905 DM = 697mg/100g fresh weight); IML does NOT make correction for DM (Reddy et al. 1989 midpoint); used Reddy 2002 midpoint value		Frossard, J Sci Food Agric 2000, reports similar values to Reddy et al. 1989 as DM
				20004	Barley, Hulled	354	2.77
Maize, White	Default composition: 56 Maize, 58 Flour of Maize, 64 Starch of Maize, 846 Gluten Feed and Meal; nutrient data only: 57 Germ of Maize, 59 Bran of Maize, 63 Maize gluten	2514		20316	Corn flour, wholegrain, white	361	1.73		111508	ingredient, flour, corn, whole grain, white	361	1.73	940	53.8413	1		7075	maizemeal, wholegrain, white	362	1.8	800	44.0404		USDA 20320/Reddy 2002	maizemeal, wholegrain, white	362	1.82	835	930		45.462	1		NDSR is based on corn flour (USDA 20316), IML based on cornmeal (USDA 20320); used USDA 20320	Midpoint of Reddy 2002 value for cornmeal (range = 790 to 1070mg/100g=930*0.8975 DM = 835mg/100g fresh weight); IML Makes correction for DM (source is Reddy et al. 1989). NDSR values for cornmeal, degermed have same phytate content as whole grain. Masa values in NDSR have a 67% reduction in phytate due to nixtamilization and tortilla values in IML have no reduction due to nixtamilization (FFI Iro…		Reddy 2002: Range of corn phytate values = 750-2220mg/100g; Frossard, J Sci Food Agric 2000, reports similar values to Reddy et al.1989 as dry matter (DM)
				20320	CORNMEAL,WHOLE-GRAIN,WHITE	362	1.82
Rye	Default composition: 71 Rye, 72 Flour of Rye; nutrient data only: 73 Bran of Rye	2515		20062	RYE	338	2.65		10786	ingredient, flour, rye, used in recipes not containing yeast	349	2.17	890	40.641	1		WFOOD C06	Rye	335	2.7	599	21.9835		USDA 20062/Reddy 2002	Rye	338	2.65	894	1000		33.4292	1		Rye (USDA 20062) = 2.65mg/100g (338 kcal), matches value in IML; NDSR value was rye flour, medium (matches USDA 20064), unable to determine if flour is from whole grain rye; used USDA 20062 value for whole grain	NDSR phytate is for rye flour, and IML phytate for rye is not documented. Midpoint of Reddy 2002 value for rye (range = 540 to 1460mg/100g =1000* 0.8940 DM = 894 mg/100g fresh weight) ; used Reddy 2002 midpoint value		Frossard, J Sci Food Agric 2000, reports similar values to Reddy et al.1989 as dry matter (DM)
				20064	RYE FLOUR,MEDIUM	349	2.17
Oats	Default composition: 75 Oats, 76 Oats Rolled; nutrient data only: 77 Bran of Oats	2516		8120	CEREALS,OATS,REG & QUICK & INST,NOT FORT,DRY	379	3.64		1895	ingredient, oatmeal - dry	379	3.64	680	18.5115	1		1391	Oats, ckd	62	0.5	111	21.9982		USDA 20038/Reddy 2002	Oats	389	3.97	725	790		18.0959	1		Oats (USDA 20038) = 3.97 mg/100g (389 kcal); IML Zn value for oats, cooked (equivalent to 3.13mg Zn /389 kcal, referenced USDA 08121 but Zn value is now different in SR23); NDSR Zn value for oatmeal (USDA 08120); used USDA 20038	IML phytate value from Oberleas & Harland 1981; Midpoint of Reddy 2002 value for oats (range = 420-1160 mg/100g = 790*0.9178 DM = 725mg/100g fresh weight); used Reddy 2002 midpoint value		Frossard, J Sci Food Agric 2000, reports similar values to Reddy et al.1989 as dry matter (DM)
				20038	OATS	389	3.97
Millet	Default composition: 79 Millet, 80 Flour of Millet; nutrient data only: 81 Bran of Millet	2517		20031	MILLET,RAW	378	1.68			ingredient, millet - dry	378	1.68	511	30.1402	1		8006	Millet, Whole grain	361	3.1	870	27.8094		INFOODS (W. Africa)/ Reddy 2002	Millet	383	2.5	682	775		27.032	1		The major millet consuming region is West Africa (where it accountrs for ~25% of daily intake of Zn and phytate); more than 90% of millet under cultivation in W. and Central Africa is pearl millet (www.icrisat.org); the Zn values in USDA are non-specific (20031 'Millet raw' may be ragi millet; 20032 'millet cooked' may be pearl millet). NDSR data is most likely for ragi millet (not commonly consu…	IML phytate value from Simwemba et al, 1984. Mean of midpoints of Reddy 2002 values for 4 different species of millet, not including ragi (range = 180 to 1670 mg/100g = 775* 0.89 DM= 682 mg/100g fresh weight); used Reddy 2002 midpoint value	Leder, Encyclopedia of Life Support Systems, Zn =1.5mg - 2.9mg (finger, proso, foxtail, pearl); Eyzaguirre, J Sci Food Agric 2006, Zn= 2.9mg/100g DM whole grain, 3.6mg/ 100g DM whole-grain flour, pearl millet, chosen for high mineral content; Lestienne, Food Chem 2007, Zn = 2.0-2.57 mg/100g DM pearl millet; Tripathi, J Trace Elements Med Biol 2010, Zn = 1.72mg Zn/100g; Sankara Rao, Food Chem1983,…	El Hag, Food Chem 2002, pearl millet , Phytate =943 mg/100g; Abdalla, Food Chem 1998, 10 cultivars pearl millet Phytate = 354 - 769mg/100g; Elyas, Food Chem 2002, pearl millet Phytate=618-786 mg; Tou, LWT 2007, Phytate = 546mg/100g DM; Lestienne, Food Chem 2007, pearl millet Phytate= 720mg - 800mg /100g DM; Mouquet-Rivier, pearl millet: 460mg/100g DM (IP-6 specific); Lestienne, Food Chem 2005, pe…
				20032	MILLET,COOKED	119	0.91										WFOOD 325	Millet, finger	328	1.2	520	42.9394		USDA 20031/Reddy 2002	MILLET,RAW (Ragi)	378	1.68	557	610		32.8534	0		USDA millet, raw (20031) value comparable to the literature values for ragi millet; alternative for Zn millet values in S. Asia (not currently usedd), however over 1/2 of all millet grown today is pearl millet (www.icrisat.org)	IML ragi millet phytate value from NIN Table #8(www.fao.org/infoods/software/wfood2.rtf , p. 122). Midpoint of Reddy 2002 (range = 550 to 670 mg/100g =610*0.915DM = 557mg/100g fresh weight; alternative for Zn millet values in S. Asia (not currently usedd), however over 1/2 of all millet grown today is pearl millet (www.icrisat.org)
Sorghum	Default composition: 83 Sorghum, 84 Flour of Sorghum; nutrient data only: 85 Bran of Sorghum	2518		20067	SORGHUM FLOUR	361	1.44		28952	ingredient, sorghum	339	1.4	810	57.3312	1		8012	Sorghum, whole grain	332	1.6	618	38.2739		INFOODS (W. Africa)/ Reddy 2002	Sorghum	375	1.825	900	1010		48.8667	1		The major sorghum consuming region is West Africa (where it accounts for ~13-20% of daily intake of Zn and phytate); the Zn values in USDA (20067) and NDSR are for sorghum flour. IML Zn values are from NIN Table #4 AG20. Opted to used mean of sorghum values from the INFOODS Regional nutrient database for West Africa = 1.825 Zn/100g	IML phytate values from NIN (Phytate Phosphorus @ 28.16%); Midpoint of Reddy 2002 (range = 670-1350 mg/100g= 1010* 0.89DM = 900mg/100g fresh weight (does not include high and low tannin measures).	Sankara Rao, Food Chem 1983, Zn = 2.5mg/100g; Tripathi, J Trace Elements Med Biol 2010, Zn= 1.7mg/100g; Ragaee, Food Chem 2006, Zn = 3.1mg/100g; Barikmo, J Food Comp Anal 2007 Zn= 2.0mg/100g (range 1.0-5.0mg/100g); Lestienne, Food Chem 2005 Zn = 1.57mg/100g DM; Mitchikpe, J Food Comp Anal 2008 Zn= 2.2-2.3mg /100gDM; Hemalatha EJCN 2007 Zn=2.24mg/100g; Asiedu, Food Chem 1993, Zn= 1.8-2.0mg/100g DM…	Garcia-Estepa, Food Research International 1999 Phytate = 1014mg/100g; Osman, J Saudi Soc Agric Sci 2011, Phytate =301 - 366mg/100g; Traore, Food Chem 2004, Phytate= 830mg/100g IP6 DM; Frontela, J Food Comp Anal 2008, Phytate= 1175 mg/100g (Ip5 and IP6); Grenier 2006: 590-1180mg/100g; Lestienne, Food Chem 2005 Phyate= 925mg/100g DM; Mitchikpe J Food Comp Anal 2008 Phytate= 373-503 mg/100g (but ma…
Cereals, Other	Default composition: 68 Popcorn, 89 Buckwheat, 90 Flour of Buckwheat, 92 Quinoa, 94 Fonio, 95 Flour of Fonio, 97 Triticale, 98 Flour of Triticale, 101 Canary seed, 103 Mixed grain, 104 Flour of Mixed Grain, 108 Cereals, nes, 111 Flour of Cereals, 113 Cereal Preparations, Nes; nutrient data only: 91 Bran Buckwheat, 96 Bran of Fonio, 99 Bran of Triticale, 105 Bran of Mixed Grains, 112 Bran of Cerea…	2520			Cereals, other	364	2.812			Cereals, other	364	2.812	1054.2	37.1485	1			Cereals, other	361.4	2.61	858.5	32.5937		NDSR 10788, 11988, 18417, 18418, 1051	Cereals, other	364	2.812	1054.2	1054.2		37.1485	1		IML composition of "cereals, other" unknown. NDSR and USDA mean Zn values same (=2.8mg/100g); used NDSR (Reddy 2002 only has phytate values for 2 of the 5 included grains)	IML composition of "cereals, other" unknown; used NDSR (Reddy 2002 only has phytate values for 2 of the 5 included grains)
				20008	BUCKWHEAT	343	2.4		10788	ingredient, flour, buckwheat	335	3.12	1957	62.1541	0.2										ingredient, flour, buckwheat	335	3.12	1957	62.1541		62.1541	0.2
				20011	BUCKWHEAT FLR,WHOLE-GROAT	335	3.12		11988	snacks, popcorn, home popped, hot air popped	387	3.08	614	19.7538	0.2										snacks, popcorn, home popped, hot air popped	387	3.08	614	19.7538		19.7538	0.2
					POPCORN,AIR-POPPED	387	3.08		18417	ingredient, quinoa - dry	368	3.1	1180	37.7185	0.2										ingredient, quinoa - dry	368	3.1	1180	37.7185		37.7185	0.2
				19034	QUINOA,UNCKD	368	3.1		18418	ingredient, flour, triticale flour - whole grain	338	2.66	603	22.4631	0.2										ingredient, flour, triticale flour - whole grain	338	2.66	603	22.4631		22.4631	0.2
				20035	TRITICALE	336	3.45		IML 1051	fonio	392	2.1	917	43.2697	0.2										fonio	392	2.1	917	43.2697		43.2697	0.2
				20069	TRITICALE FLR,WHOLE-GRAIN	338	2.66
Cereals, Other, Teff	UNLISTED	2520(2)		20142	TEFF,UNCKD	367	3.63		28908	Teff	367	3.63	528	14.4132	1									USDA 20142/ Good 2009, Abebe 2007	Teff	367	3.63	826	826		22.548	1		Not included in IML; USDA and NDSR values are the same; used USDA Zn value	Not included in IML, not documented in NDSR; 826mg phytate/100g fresh weight (mean of Good 2009 and Abebe 2007)		Good (ETH dissertation), Phytate=1064mg/100g DM; Abebe, J Food Comp Anal 2007, Phytate= 681.7mg/100 fresh weight
Potatoes	Default composition: 116 Potatoes, 117 Potatoes Flour, 118 Frozen Potatoes, 119 Starch of Potatoes, 121 Tapioca of Potatoes	2531		11363	POTATOES,BKD,FLESH,WO/SALT	93	0.29		7581	Vegetable, potato, boiled w/o skin	86	0.27	41	15.0471	1		1786	POTATO, BKD OR BLD (W/ OR W/O SKIN)	93	0.3	81	26.7545		USDA 11367/Reddy 2002	POTATOES,BLD,CKD WO/ SKN,FLESH,W/ SALT	86	0.27	21	95	46-73	7.70707	1		Values between databases similar; used USDA Zn value	NDSR phytate value may be from Phillippy 2004; IML from Oberleas & Harland (1981); Midpoint of Reddy 2002 (range 10-180mg/100g = 95*0.2254 DM =21.4 mg/100g fresh weight		Phillippy, J Agric Food Chem 2003 , Phytate =73mg/100g DM ; Phillippy, J Food Comp Anal 2004, Phytate= 46mg/100g DM
				11367	POTATOES,BLD,CKD WO/ SKN,FLESH,W/O SALT	86	0.27
Cassava	Default composition: 125 Cassava, 126 Flour of Cassava, 127 Tapioca of Cassava, 128 Cassava Dried, 129 Cassava Starch	2532		11134	CASSAVA,RAW	160	0.34		19273	cassava (yuca), cooked	161	0.32	133	41.1847	1		7025	CASSAVA ROOT, WHITE BLD	131	0.3	54	17.8364		USDA 11134/ Reddy 2002	cassava, white	160	0.34	58	145	133	16.9037	1		IML Zn values from Ferguson et al, 1993 (www.fao.org/infoods/software/wfood2.rtf , p. 101); used USDA Zn value	NDSR phytate value may be from Phillippy 2003; IML was from Ferguson 1993 (www.fao.org/infoods/software/wfood2.rtf , p. 101), there is a 3x difference between these two databases; Midpoint of Reddy 2002: 100-190mg/100g = 145mg*0.4032DM= 58.46g/100 fresh weight	Ferguson, J Food Comp Anal 1988, Zn =0.6mg/100g DM; Charles,Food Chem 2005, Zn= 0.19mg/100g DM
Sweet Potatoes	Default composition: 122 Sweet potatoes	2533		11510	SWEET POTATO,CKD,BLD,WO/ SKN	76	0.2		11019	yams (sweet potato type), boiled	76	0.2	3.2	1.58545	1		2249	SWEET POTATO, TUBER, ORANGE/R	103	0.3	10	3.30303		USDA 11510/ Reddy 2002	SWEET POTATO,CKD,BLD,WO/ SKN	76	0.2	39	195	3	19.3227	1		used USDA Zn values	IML phytate value from Ferguson 1993 (www.fao.org/infoods/software/wfood2.rtf , p. 139); Midpoint of Reddy 2002: 70-320mg/100g = 195mg *0.1987DM = 39 mg/100g fresh weight		Lots of reports of sweet potato phytate being very low or undetectable; Ferguson, J Food Comp Anal 1988, Phytate =40mg/100g DM; 35mg/100g fresh weight; Phillippy J Agric Food Chem 2003, Phytate non-detectable (3.0mg/100g DM); Ferguson, J Comp Food Anal 1993, Phytate =10mg/100g fresh weight
Yams	Default composition: 137 Yams	2535		11602	YAM,CKD,BLD,DRND,OR BKD,WO/SALT	116	0.2		IML	Yam (IML)	97	0.5	50	9.90909	1		7235	YAM, WHITE, TUBER, CKD	97	0.5	50	9.90909		USDA 11602/Reddy 2002	YAM,CKD,BLD,DRND,OR BKD,WO/SALT	116	0.2	49	165	46	22.7909	1		IML Zn value from Bradbury & Holliday 1988 (www.fao.org/infoods/software/wfood2.rtf , p. 144); not contained in NDSR; used USDA zinc value	IML phytate value from Ferguson 1993 (www.fao.org/infoods/software/wfood2.rtf , p. 144); not contained in NDSR; Midpoint of Reddy 2002 (range = 40-290mg/100g = 165*0.2987 = 49.3mg/100g fresh weight
Roots, Other	Default composition: 135 Yautia (cocoyam), 136 Taro (cocoyam), 149 Roots and Tubers, nes, 150 Flour of Roots and Tubers, 151 Roots and Tubers Dried	2534		11519	TARO,COOKED,WITHOUT SALT	142	0.27		7661	Taro	142	0.27	104.32	38.2858	1		WFOOD 506	Taro	151	0.8	78	9.66136		USDA 11519/IML	TARO,COOKED,WITHOUT SALT	142	0.27	116	320	169	42.5724	1		IML Zn value not documented; used USDA zinc value; updated previous IML database (Wuehler 2005) to not include turnip root	IML phytate value not documented; NDSR data is likely from Phillippy 2003; Reddy 2002: 320 mg/100g DM*0.362 = 116mg/100g fresh weight ; updated previous IML database (Wuehler 2005) to not include turnip root
Sugar (Raw Equivalent)	Default composition: 158 Cane sugar, raw, centrifugal, 159 Beet sugar, raw, centrifugal, 162 Sugar Raw Centrifugal, 164 Sugar Refined, 168 Sugar Confectionery, 171 Sugar flavoured	2542		19334	SUGARS,BROWN	380	0.03		4307	Sugar, raw	380	0.03	0	0	1		2229	sugar, brown, cane or beet	376	0.2	0	0		USDA 19334	SUGARS,BROWN	380	0.03	0				1		IML Zn value was USDA 19334 (since changed); used USDA Zn value	Assume phytate = 0
Sugar Beet	Default composition: 157 Sugar beet	2537							IML	Sugar beet	26	0	0	0	1		WFOOD 805	Sugar beet	26	0	0			IML WFOOD 805	Sugar beet	26	0	0				1		Unknown source	Reddy 2002 for phytate: 10mg/100g (DM?), Lehrfeld 1989 (Cereal Chemistry) assume phytate value = 0
Sugar Cane	Default composition: 156 Sugar cane	2536							IML	Sugar cane	26	0	0	0	1		WFOOD 805	Sugar cane	26	0	0			IML WFOOD 805	Sugar cane	26	0	0				1		Unknown source	Assume phytate value =0
Sugar, Non-Centrifugal	Default composition: 163 Sugar Non- Centrifugal	2541							4307	Sugar, raw	380	0.03	0	0	1		2229	sugar, brown, cane or beet	376	0.2	0	0		USDA 19334	SUGARS,BROWN	380	0.03	0				1		used sugar (raw equivalent) values for non-centrifugal sugar (USDA Zn); updated previous IML database (Wuehler 2005) to not used sago palm	Assume phytate = 0; updated previous IML database (Wuehler 2005) to not used sago palm
Sweeteners, Other	Default composition: 154 Fructose Chemically Pure, 155 Maltose Chemically Pure, 160 Maple Sugar and Syrups, 161 Sugar crops, nes, 166 Other Fructose and Syrup, 167 Sugar, nes, 172 Glucose and Dextrose, 173 Lactose, 175 Isoglucose, 633 Beverage Non-Alc; nutrient data only: 165 Molasses	2543								Sweeteners, other	276.623	0.0766667	0	0	1			Sweeteners, other	297.333	2.32667	0	0		NDSR 4293, 2816, 28930, 38937, 28933	Sweeteners, other	276.623	0.0766667	0				1		IML Zn values unknown composition (perhaps this value includes maple syrup; Wuehler 2005); used NDSR composite, includes dextrose and lactose (unsure about light vs. dark corn syrup)	used NDSR phytate values
				44018	SWEETENERS,TABLETOP,FRUCTOSE,LIQ	279	0.09		4293	sweeteners, fructose sweetener	368	0	0		0.2										sweeteners, fructose sweetener	368	0					0.2
				19350	SYRUPS,CORN,LT	283	0.44		2816	sweeteners, syrup, pure corn syrup	283	0.44	0		0.2										sweeteners, syrup, pure corn syrup	283	0.44					0.2
				19349	SYRUPS,CORN,DK	286	0.04
									28930	food industry additives and ingredients, glucose (dextrose)	345	0	0		0.2										food industry additives and ingredients, glucose (dextrose)	345	0					0.2
									38937	food industry additives and ingredients, lactose	382.74	0	0		0.2										food industry additives and ingredients, lactose	382.74	0					0.2
				19351	SYRUPS,CORN,HIGH-FRUCTOSE	281	0.02		28933	food industry additives and ingredients, high fructose corn syrup, 55%	281	0.02	0		0.2										food industry additives and ingredients, high fructose corn syrup, 55%	281	0.02					0.2
Beans	Default composition: 176 Beans, dry	2546			BEANS, ALL	125.143	1.07429			Beans	129.778	1.16111	255	21.7621	1		7005	KIDNEY BEAN, MATURE BOILED	127	1.1	617	55.581		USDA 16081, 16038, 16002, 16025, 16043, 16072, 16033/Reddy	Beans	125.1	1.07	401	452		37.1359	1		IML Zn values for kidney beans (USDA 16028); used USDA Zn values (include types for which there is phytate data)	NDSR Phytate values are 40% of IML (cooked, potentially soaked?) ; IML Phytate value is for kidney beans only (unsoaked/uncooked; midpoint of Reddy 1989, DM not taken into account); Mean of midpoints Reddy 2002 = 1239mg/100g*0.887DM = 1100 mg/2.74 adjustment for cooking (kcal); 15% reduction in phytate due to cooking included in extraction and processing estimates
				16081	Beans, Mung, mature seeds, cooked, boiled, without salt	105	0.84		2910	vegetables, beans, mung beans, cooked from dried	105	0.84	209	24.6548	0.111111										Beans, Mung, mature seeds, cooked, boiled, without salt	105	0.84					0.142857
				16038	Beans, Navy, mature seeds, cooked, boiled, without salt	140	1.03		2912	vegetables, beans, navy beans, cooked from dried	140	1.03	210	20.203	0.111111										Beans, Navy, mature seeds, cooked, boiled, without salt	140	1.03					0.142857
				16002	Beans, adzuki, mature seeds, cooked, boiled, without salt	128	1.77		27430	vegetables, beans, adzuki beans	128	1.77	484	27.096	0.111111										Beans, adzuki, mature seeds, cooked, boiled, without salt	128	1.77					0.142857
				16025	Beans, great northern mature seeds, cooked, boiled, without salt	118	0.88		2916	vegetables, beans, great northern, cooked from dried	139	1.38	225	16.1561	0.111111										Beans, great northern mature seeds, cooked, boiled, without salt	118	0.88					0.142857
				16043	Beans, pinto, mature seeds, cooked, boiled, without salt	143	0.98		2920	vegetables, beans, pinto beans, cooked from dried	143	0.98	199	20.1215	0.111111										Beans, pinto, mature seeds, cooked, boiled, without salt	143	0.98					0.142857
				16072	Beans, lima, mature seeds, cooked, boiled, without salt	115	0.95		2903	vegetables, beans, lima beans, cooked from dried	115	0.95	141	14.7072	0.111111										Beans, lima, mature seeds, cooked, boiled, without salt	115	0.95					0.142857
				16033	Beans, kidney, mature seeds, cooked, boiled, without salt	127	1.07		2900	vegetables, beans, kidney beans, cooked from dried	127	1	199	19.7191	0.111111										Beans, kidney, mature seeds, cooked, boiled, without salt	127	1.07					0.142857
				16015	Beans, black, mature seeds, cooked, boiled, without salt	132	1.12		2887	vegetables, beans, black, cooked from dried	132	1.12	403	35.655	0.111111
									2889	vegetables, beans, brown, cooked from dried	139	1.38	225	16.1561	0.111111
Peas	Default composition: 187 Peas, dry	2547		16086	PEAS,SPLIT,MATURE SEEDS,CKD,BLD,WO/SALT	118	1		3066	vegetables, peas, split peas - yellow or green, cooked from dried	118	1	99	9.81	1		WFOOD 160620	Pea, dry	369	3.7	860	23.0319		USDA 16086/Reddy	PEAS,SPLIT,MATURE SEEDS,CKD,BLD,WO/SALT	118	1	301	339		29.8264	1		IML Zn values not documented;used USDA Zn values	NDSR Phytate values are 40% of IML (cooked, possibly soaked ); IML Phytate data came from Reddy (not corrected for DM; Midpoint of Reddy 2002: 980mg/100g*0.887DM = 869.26/2.89 (cooking adjustment) = 300.78mg fresh weight; 15% reduction in phytate due to cooking included in extraction and processing estimates	Abebe, J Food Comp Anal 2010, Zn =4.1mg/100g; Wang, Food Chem 2008, Zn = 2.4-3.7 mg/100g (DM?)	Nikolopoulou, Food Chem 2007, Phytate= 186-1117mg phyt/100g; Abebe, J Food Comp Anal 2007, Phytate= 235mg/100g (DM?), Alanso: 1055-1180mg/100g DM; Wang, Food Chemistry 2008, Phytate= 640-830mg/100g DM; Wang Food Chem 2010, Phytate = 8.1mg/100g (range 4,2-11.9mg/100g) DM;
				16085	PEAS,SPLIT,MATURE SEEDS,RAW	341	3.01
Pulses, other	Default composition: 181 Broad beans, horse beans, dry, 191 Chick peas, 195 Cow peas, dry, 197 Pigeon peas, 201 Lentils, 203 Bambara beans, 205 Vetches, 210 Lupins, 211 Pulses, nes, 212 Flour of Pulses; nutrient data only: 213 Bran of Pulses	2549			Pulses, other	125.4	1.2			Pulses, other	125.4	1.2	206	17.0106	1			Pulses, other	174.833	1.43333	407.833	28.1948		USDA16063, 16053, 16102, 16070, 16057/Reddy 2002	Pulses, other	125.4	1.2	305	341		25.1856	1		IML Zn values unknown composition (Wuehler 2005); used composite of UDSA Zn values (include types for which there is phytate data in Reddy 2002)	NDSR Phytate values are 40% of IML (cooked, possibly soaked ); Mean of midpoints of Reddy 2002 =966mg/100g*0.889DM/2.82 adjustment for cooking = 304.7mg fresh weight; 15% reduction in phytate due to cooking included in extraction and processing estimates	Cowpeas: Ferguson, J Food Comp Anal 1988, Zn=2.9mg/100g DM; Lestienne, Food Chem 2005, Zn=3.8mg/100g DM; Mitchikpe, J Food Comp Anal 2008, Zn= 4.6-4.9mg/100g DM; Pigeon Peas: Ferguson, J Food Comp Anal 1988, Zn=2.4-2.5mg/100g DM	Cowpeas: Ferguson, J Food Comp Anal 1988, Phytate=1090 mg/100g DM; Lestienne, Food Chem 2005, Phytate=559mg/100g DM; Mitchipike, J Food Comp Anal 2008, Phytate=251-769mg/100g DM; Egounlety, J Food Engineering 2003, Phytate= 460mg/100g DM; Pigeonpeas: Ferguson, J Food Comp Anal 1988, Phytate=690-790mg/100g DM;
				16063	Cowpeas, common, mature seeds, cooked, boiled, without salt	116	1.29		3052	vegetables, peas, cowpeas, cooked from dried	116	1.29	191	14.6716	0.2										Cowpeas, common, mature seeds, cooked, boiled, without salt	116	1.29					0.2
				16053	Broadbeans (fava beans), mature seeds, cooked, boiled without salt	110	1.01		18374	vegetables, beans, broadbeans, cooked from dried	110	1.01	379	37.1836	0.2										Broadbeans (fava beans), mature seeds, cooked, boiled without salt	110	1.01					0.2
				16102	pigeon peas (red gram), mature seeds, cooked, boiled, without salt	121	0.9		7549	vegetables, peas, pigeonpeas - cooked	121	0.9	182	20.0384	0.2										pigeon peas (red gram), mature seeds, cooked, boiled, without salt	121	0.9					0.2
				16070	Lentils, mature seeds, cooked, boiled, without salt	116	1.27		3019	vegetables, lentils, cooked from dried	116	1.27	142	11.0795	0.2										Lentils, mature seeds, cooked, boiled, without salt	116	1.27					0.2
				16057	Chickpeas, mature seeds, cooked, boiled, without salt	164	1.53		2890	vegetables, beans, garbanzo beans, cooked from dried	164	1.53	136	8.80808	0.2										Chickpeas, mature seeds, cooked, boiled, without salt	164	1.53					0.2
Nuts	Default composition: 216 Brazil nuts, with shell, 217 Cashew nuts, with shell, 220 Chestnuts, 221 Almonds, with shell, 222 Walnuts, with shell, 223 Pistachios, 224 Kolanuts, 225 Hazelnuts, with shell, 226 Arecanuts, 229 Brazil Nuts Shelled, 230 Cashew Nuts Shelled, 231 Almonds Shelled, 232 Walnuts Shelled, 233 Hazelnuts Shelled, 234 Nuts, nes, 235 Prepared Nuts (Exc.Groundnuts)	2551			Nuts	613.2	3.692			Nuts	571	3.00143	415.709	13.7244	1			Nuts	552.286	2.86	2010	69.6408		USDA 12061, 12078, 12087, 12120, 12155/Reddy 2002	Nuts	613.2	3.692	2131	2233		57.1947	1		IML Zn values unknown composition (Wuehler 2005); used composite of UDSA Zn values (include types for which there is phytate data in Reddy 2002)	IML phytate values from Oberleas 1983; NDSR phytate values are much lower than IML (unknown source); Mean of midpoint of Reddy 2002 = 2233mg/100g *0.955DM = 2131 mg/100g fresh weight
				12061	Almonds	575	3.08		2140	nuts and seeds, almonds, raw (dried - unblanched)	575	3.08	943	30.3385	0.142857										Almonds	575	3.08					0.2
				12078	Brazil Nuts	656	4.06		2155	nuts and seeds, Brazil nuts, unsalted	656	4.06	190	4.63726	0.142857										Brazil Nuts	656	4.06					0.2
				12087	Nuts, cashew nuts, raw	553	5.78		106688	nuts and seeds, cashews, raw	553	5.78	498.96	8.55405	0.142857										Nuts, cashew nuts, raw	553	5.78					0.2
				12120	Nuts, hazelnuts or filberts	628	2.45		2165	nuts and seeds, chestnuts, raw (dried)	369	0.35	88	24.9143	0.142857										Nuts, hazelnuts or filberts	628	2.45					0.2
				12155	Nuts, walnuts, english	654	3.09		2174	nuts and seeds, filberts, raw (dried)	628	2.45	230	9.30241	0.142857										Nuts, walnuts, english	654	3.09					0.2
									7707	nuts and seeds, pistachio nuts, raw (dried)	562	2.2	290	13.062	0.142857
									2237	nuts and seeds, walnuts	654	3.09	670	21.4857	0.142857
Soyabeans	Default composition: 236 Soybeans, 239 Soya Sauce, 240 Soya Paste, 241 Soya Curd	2555		16109	SOYBEANS,MATURE CKD,BLD,WO/SALT	173	1.15		2925	vegetables, beans, soybeans, cooked from dried	173	1.15	412	35.5004	1		8015	SOYBEAN, MATURE BOILED	166	2	589	29.1823		USDA 16109/Reddy 2002	SOYBEANS,MATURE CKD,BLD,WO/SALT	173	1.15	573	626		49.3731	1		Zn value in IML was from soybeans, mature, bld (USDA 16108); but Zn values higher than current SR23; used USDA Zn values	IML phytate values from Reddy 1989, midpoint of range; Midpoint of Reddy 2002 = 1000-2220mg/100g =1610*0.915DM =1473.15/2.57 correction for cooking = 573 mg/100g fresh weight ; 15% reduction in phytate due to cooking included in extraction and processing estimates	Lestienne, Food Chem 2005, Zn=3.6mg/100g DM; Mitchikpe, J Food Comp Anal 2008, Zn=5.1mg/100gDM	Lestienne, Food Chem 2005, Phytate= 878mg/100g DM; Egoulety, J Food Engineering 2003, Phytate=1270mg/100gDM; Mitchipke, J Food Comp Anal 2008, Phytate=808mg/100gDM;
Groundnuts (Shelled Eq)	Default composition: 242 Groundnuts, with shell, 243 Groundnuts Shelled, 246 Prepared Groundnuts, 247 Peanut Butter	2556			Groundnuts (shelled eq)	576	3.29			Groundnuts (Shelled Eq)	576	3.29	536	16.1437	1			Peanuts, all types, raw or cooked	567	3.3	1760	52.8485		USDA 16087, 16390/Reddy 2002	Groundnuts (Shelled Eq)	576	3.29	1314	1405		39.5761	1		Zn values same among databases; used USDA Zn values	3x difference between IML and NDSR; IML value was from Reddy 1989 (not corrected for DM); Midpoint of Reddy 2002 =1405*0.935 DM = 1313mg/100g fresh weight; Lower value is DM (McKenzie-Parnell, IML value was		Harland, J Food Comp Anal2004, Phytate = 2008mg/100g DM (planters dry roasted)
				16087	PEANUTS,ALL TYPES,RAW	567	3.27		2196	nuts and seeds, peanuts, raw (dried)	567	3.27	624	18.9091	0.5										PEANUTS,ALL TYPES,RAW	567	3.27					0.5
				16390	PEANUTS,ALL TYPES,DRY-ROASTED,WO/SALT	585	3.31		2198	nuts and seeds, peanuts, roasted, dry roasted, unsalted	585	3.31	448	13.4117	0.5										PEANUTS,ALL TYPES,DRY-ROASTED,WO/SALT	585	3.31					0.5
Sunflowerseed	Default composition: 267 Sunflower seed	2557		12036	SUNFLOWER SD KRNLS,DRIED	584	5		2227	nuts and seeds, sunflower seeds, raw (dried)	584	5	1608	31.8676	1		WFOOD BF	sunflower seed	588	10.3	5160	49.6417		USDA 12036/Miller et al. 1986	SUNFLOWER SD KRNLS,DRIED	584	5	2052	2200		40.6669	1		ML is undocumented; used USDA Zn values	IML phytate values from Reddy are % Phytic acid concentrations of plants on a weight basis (Reddy et al. 1989, Lott et al. Seed Sci Research 2000 for global estimates of IP); NDSR values are kernals only; Miller et al. Food Chemistry; 21 (205-209) 1986 "Phytic Acid in Sunflower seeds, pressed cake and protein concentrate", 2200 mg/100g*0.9527DM = 2052 mg/100g fresh weight
Coconuts - Incl Copra	Default composition: 249 Coconuts, 250 Coconuts Desiccated, 251 Copra	2560		12104	COCONUT MEAT,RAW	354	1.1		2168	nuts and seeds, coconut, fresh	354	1.1	620	55.8512	1		789	Coconut meat, fresh	354	1.1	324	29.1868		USDA 12104/Reddy 2002	COCONUT MEAT,RAW	354	1.1	620.1	1170		55.8602	1		Zn values same among databases; used USDA Zn values	IML phytate values McCance and Widdowson. The Composition of Foods. 1978 (based on Phytate Phosphorus @28.76%); Reddy 2002 = 1170mg/100g *0.47DM = 620.1 mg/100g fresh weight
Sesameseed	Default composition: 289 Sesame seed	2561		12023	SESAME SEEDS,WHOLE,DRIED	573	7.75		2221	nuts and seeds, sesame seeds, whole (unhulled), dried	573	7.75	1630	20.8411	1		7220	Sesame seed, whole, dried	573	7.8	4710	59.8357		USDA (12023) IML/Reddy 2002	SESAME SEEDS,WHOLE,DRIED	573	7.75	1372	1440		17.5423	1		Zn values same among databases; used USDA Zn values	IML phytate values from Reddy are % Phytic acid concentrations of plants on a weight basis (Reddy et al. 1989, Lott et al. Seed Sci Research 2000 for global estimates of IP); Reddy 2002 (white sesame seed) = 1440mg/100g *0.9531DM = 1372mg/100g fresh weight		Kumar, Food Chem 2010, Phytate=3930 - 5720mg/100g; Kamchan, J Food Comp Anal 2004, Phytate=1207-1414.5mg/100g (DM?)
Olives	Default composition: 260 Olives, 262 Olives Preserved	2563		09193	OLIVES,RIPE,CND (SMALL-EXTRA LRG)	115	0.22		593	Olives, black	115	0.22	3	1.35124	1		1406	Olives, ripe, cnd, pitted	115	0.2	0	0		USDA 09193	OLIVES,RIPE,CND (SMALL-EXTRA LRG)	115	0.22	0				1		Zn values same among databases; used USDA Zn values	Assume phytate =0 (IML)
Palmkernals	UNLISTED	9997							IML	Palm, nut	203	0.1	8	7.92727	1		WFOOD 1470	Palm, nut	203	0.1	8	7.92727		IML	Palm, nut	203	0.1	8			7.92727	1		used IML Zn value (only value available, source not documented)	used IML phytate value (only value available, source not documented)
Cottonseed	UNLISTED	9998		12160	COTTONSEED KRNLS,RSTD (GLANDLESS)	506	6		IML	Cottonseed	506	6	2128	35.1442	1		USDA 1216	Cottonseed Krnls, rstd (glandles)	506	6	2128	35.1442		12160 USDA 12160/IML	COTTONSEED KRNLS,RSTD (GLANDLESS)	506	6	2128			35.1442	1		NDSR and IML do not include cottonseed; used USDA Zn values	used generic seed data from IML (Watermelon seed data from Oberleas 1983), Wuehler 2005
Rape and Mustard Seed	UNLISTED	9999		02024	Mustard seed (ground)	508	6.08		2775, phytate IML	mustard, seed	580	6.5	1844.67	28.1215	1		WFOOD BD	Mustard seeds	541	7.5	2128	28.1154		USDA 02024/IML	Spices, mustard seed, ground	508	6.08	2128			34.6818	1		used USDA Zn values	used generic seed data from IML (Watermelon seed data from Oberleas 1983), Wuehler 2005
Oilcrops, Other	Default composition: 263 Karite Nuts (Sheanuts), 265 Castor oil seed, 275 Tung Nuts, 277 Jojoba Seeds, 280 Safflower seed, 296 Poppy seed, 299 Melonseed, 305 Tallowtree Seeds, 310 Kapok Fruit, 311 Kapokseed in Shell, 312 Kapokseed Shelled, 333 Linseed, 336 Hempseed, 339 Oilseeds, Nes, 343 Flour of Oilseeds	2570			Oilcrops, other	529.5	6.12			Oilcrops, other	528.333	6.41333	1871.67	28.9187	1			Oilcrops, other	530.398	7.59433	2128	27.7662		USDA	Oilcrops, other	529.5	6.12	1943.5			31.4678	1		IML Zn values unknown composition (Wuehler 2005); used composite of UDSA Zn values , same values are given in USDA (seeds for which there is phytate data in NDSR)	used NDSR values for phytate (poppy and flax seeds)
				02033	Spices, poppy seed	525	7.9		2216	nuts and seeds, poppy seeds	525	7.9	2159	27.0807	0.333333										Spices, poppy seed	525	7.9	2159	27.0807		27.0807	0.5
				12220	Seeds, flaxseed	534	4.34		17665	nuts and seeds, flax seeds, not fortified	534	4.34	1728	39.4537	0.333333										Seeds, flaxseed	534	4.34	1728	39.4537		39.4537	0.5
									111498	nuts and seeds, hemp seeds	526	7	1728	24.4613	0.333333
Palm Oil	Default composition: 257 Palm oil, 1276 Fatty Acids, 1277 Res.Fatty Subs	2577		04055	OIL,PALM	884	0		1170	fats, oil, palm	884	0	0		1		8034	Palm oil, red, fresh	862	0	0			04055 USDA	OIL,PALM	884	0	0				1		used USDA zinc values	Assumed phytate = 0 for oils
Sesameseed Oil	Default composition: 290 Sesame oil	2579		04058	OIL,SESAME,SALAD OR COOKING	884	0		1175	fats, oil, sesame	884	0.16	0	0	1		WFOOD G01	Sesame oil	884	0	0			04058 USDA	OIL,SESAME,SALAD OR COOKING	884	0	0				1		used USDA zinc values	Assumed phytate = 0 for oils
Soyabean Oil	Default composition: 237 Soybean oil	2571		04044	OIL,SOYBN,SALAD OR COOKING	884	0.01		1177	fats, oil, soybean - unhydrogenated	884	0.01	0	0	1		2707	Soybean oil	884	0	0			04044 USDA	OIL,SOYBN,SALAD OR COOKING	884	0.01	0				1		used USDA zinc values	Assumed phytate = 0 for oils
Coconut Oil	Default composition: 252 Coconut (copra) oil	2578		04047	OIL,COCNT	862	0		1164	fats, oil, coconut	862	0.13	0	0	1		8033	Coconut oil	862	0	0			04047 USDA	OIL,COCNT	862	0	0				1		used USDA zinc values	Assumed phytate = 0 for oils
Cottonseed Oil	Default composition: 331 Cottonseed oil	2575		04502	OIL,CTTNSD,SALAD OR COOKING	884	0		1166	fats, oil, cottonseed	884	0	0		1		WFOOD 133020	Cottonseed oil	884	0	0			04502 USDA	OIL,CTTNSD,SALAD OR COOKING	884	0	0				1		used USDA zinc values	Assumed phytate = 0 for oils
Groundnut Oil	Default composition: 244 Groundnut oil	2572		04042	OIL,PNUT,SALAD OR COOKING	884	0.01		1172	fats, oil, peanut	884	0.01	0	0	1		8035	Peanut oil	884	0	0			04042 USDA	OIL,PNUT,SALAD OR COOKING	884	0.01	0				1		used USDA zinc values	Assumed phytate = 0 for oils
Maize Germ Oil	Default composition: 60 Maize oil	2582		04518	OIL,CORN,INDUSTRIAL & RTL,ALLPURP SALAD OR COOKING	884	0		1165	fats, oil, corn	884	0.16	0	0	1		WFOOD 775	Maize oil	884	0	0			04518 USDA	OIL,CORN,INDUSTRIAL & RTL,ALLPURP SALAD OR COOKING	884	0	0				1		used USDA zinc values	Assumed phytate = 0 for oils
Rape and Mustard Oil	Default composition: 271 Rapeseed oil, 293 Mustard oil	2574		04582	OIL,CANOLA	884	0		1163	fats, oil, canola (canbra or rapeseed)	884	0	0		1		WFOOD G01	Rape and mustard oil	884	0	0			04582 USDA	OIL,CANOLA	884	0	0				1		used USDA zinc values	Assumed phytate = 0 for oils
Ricebran Oil	Default composition: 36 Rice bran oil	2581		04037	OIL,RICE BRAN	884	0		106481	fats, oil, rice bran	884	0	0		1		USDA 04037	Vegetable oil, rice bran	884	0	0			04037 USDA	OIL,RICE BRAN	884	0	0				1		used USDA zinc values	Assumed phytate = 0 for oils
Olive Oil	Default composition: 261 Olive oil, virgin, 274 Oil of Olive Residues	2580		04053	OIL,OLIVE,SALAD OR COOKING	884	0		1169	fats, oil, olive	884	0	0		1		2702	Olive oil	884	0.1	0	0		04053 USDA	OIL,OLIVE,SALAD OR COOKING	884	0	0				1		used USDA zinc values	Assumed phytate = 0 for oils
Sunflowerseed Oil	Default composition: 268 Sunflower oil	2573		04060	OIL,SUNFLOWER,LINOLEIC (LESS THAN 60%)	884	0		1179	fats, oil, sunflower	884	0	0		1		USDA 04060	OIL,SUNFLOWER,LINOLEIC (LESS THAN 60%); UDSA 04060	884	0	0	0		USDA 04060	OIL,SUNFLOWER,LINOLEIC (LESS THAN 60%)	884	0	0				1		used USDA zinc values	Assumed phytate = 0 for oils
Palmkernel Oil	Default composition: 258 Palm kernel oil	2576		04513	Vegetable oil, palm kernel	862	0		1171	fats, oil, palm kernel	862	0	0		1		USDA 04513	Vegetable oil, palm kernel	862	0	0	0		USDA 04513	Vegetable oil, palm kernel	884	0	0				1		used USDA zinc values	Assumed phytate = 0 for oils; updated IML to reflect palm kernal oil and not PALM, AFRICAN OIL PULP PUREE (WFOOD 1954)
Oilcrops Oil, Other	Default composition: 264 Butter of Karite Nuts, 266 Oil of Castor Beans, 276 Oil of Tung Nuts, 278 Oil of Jojoba, 281 Safflower oil, 297 Poppy Oil, 306 Vegetable Tallow, 307 Stillingia Oil, 313 Oil of Kapok, 334 Linseed oil, 337 Oil of Hempseed, 340 Oil of vegetable origin, nes, 664 Cocoa Butter, 1241 Liquid Margarine, 1242 Margrine Short, 1273 Castor Oil Hydr (Opal Wax), 1274 Oil Boiled Etc, 127…	2586			Oilcrops Oil, other	884	0			Oilcrops, other	884	0.0633333	0		1		WFOOD G01	Oil	884	0	0	0		USDA 42231, 04511	Oilcrops Oil, other	884	0	0				1		USDA zinc values	Assumed phytate = 0 for oils
				04511	Oil, Safflower, salad or cooking, high oleic (primary safflower oil of commerce)	884	0		1174	fats, oil, safflower	884	0.19	0		0.333333										Oil, Safflower, salad or cooking, high oleic (primary safflower oil of commerce)	884	0	0				0.5
				42231	Oil, flaxseed	884	0		17546	fats, oil, flax seed	884	0	0		0.333333										Oil, flaxseed	884	0	0				0.5
									111499	fats, oil, hemp	884	0	0		0.333333
Tomatoes	Default composition: 388 Tomatoes, 389 Tomatojuice Concentrated, 390 Juice of Tomatoes, 391 Paste of Tomatoes, 392 Tomato Peeled	2601		11530	TOMATOES,RED,RIPE,CKD	18	0.14		3160	vegetables, tomato, cooked from fresh	18	0.14	5.4	3.82208	1			Tomato, ripe or green, raw or ckd	21	0.1	6	5.94545		NDSR	tomatoes, red, ripe, ckd	18	0.14	5.4			3.82208	1		used NDSR Zn values (same as USDA) for all fruits and vegetables	IML: most phytate for IML was assumed to be 0; used NDSR phytate values for all fruits and vegetables
Onions	Default composition: 403 Onions, dry	2602		11283	ONIONS,CKD,BLD,DRND,WO/SALT	44	0.21		3043	vegetables, onion, white, yellow or red, cooked	44	0.21	7.8	4.48824	1			Onion, bulb, raw or boiled	44	0.2	0	0		NDSR	onions, ckd	44	0.21	7.8			3.68052	1		used NDSR Zn values (same as USDA) for all fruits and vegetables	IML: most phytate for IML was assumed to be 0; used NDSR phytate values for all fruits and vegetables
Vegetables, Other	Default composition: 358 Cabbages and other brassicas, 366 Artichokes, 367 Asparagus, 372 Lettuce and chicory, 373 Spinach, 378 Cassava leaves, 393 Cauliflowers and broccoli, 394 Pumpkins, squash and gourds, 397 Cucumbers and gherkins, 399 Eggplants (aubergines), 401 Chillies and peppers, green, 402 Onions (inc. shallots), green, 406 Garlic, 407 Leeks, other alliaceous veg, 414 Beans, green, 417 …	2605								Vegetables, other	41.1404	0.437368	41.9715	9.50913	1			Vegetables, other	33.375	0.366667	20.5	5.54008		NDSR	Vegetables, other	41.1404	0.437368	41.9715			9.50913	1		used NDSR Zn values; calculations and food weighting had already been done for the large composite groups and these are minimal sources of zinc and similar to/same as USDA Zn values	IML: most phytate for IML was assumed to be 0; used NDSR phytate values for all fruits and vegetables
									7641	vegetables, squash, winter types (dark green or orange), cooked	37	0.22	20	9.00826	0.0175439									7641	vegetables, squash, winter types (dark green or orange), cooked	37	0.22	20	9.00826			0.0175439
									7449	vegetables, cucumber, raw, with peel	15	0.2	2	0.990909	0.0526316									7449	vegetables, cucumber, raw, with peel	15	0.2	2	0.990909			0.0526316
									2958	vegetables, cabbage, green, cooked	23	0.2	2.2	1.09	0.0526316									2958	vegetables, cabbage, green, cooked	23	0.2	2.2	1.09			0.0526316
									7457	vegetables, eggplant, cooked	35	0.12	69.2	57.1424	0.0526316									7457	vegetables, eggplant, cooked	35	0.12	69.2	57.1424			0.0526316
									3070	vegetables, peppers, green pepper - sweet, cooked	28	0.12	24.9	20.5614	0.0526316									3070	vegetables, peppers, green pepper - sweet, cooked	28	0.12	24.9	20.5614			0.0526316
									3108	vegetables, scallions or spring onions, cooked	34	0.39	35.21	8.94613	0.0526316									3108	vegetables, scallions or spring onions, cooked	34	0.39	35.21	8.94613			0.0526316
									12061	vegetables, garlic, fresh	149	1.16	319.9	27.3269	0.0526316									12061	vegetables, garlic, fresh	149	1.16	319.9	27.3269			0.0526316
									3018	vegetables, leeks, cooked	31	0.06	22.46	37.093	0.0526316									3018	vegetables, leeks, cooked	31	0.06	22.46	37.093			0.0526316
									2894	vegetables, beans, green or string beans, cooked from fresh	35	0.25	39	15.4582	0.0526316									2894	vegetables, beans, green or string beans, cooked from fresh	35	0.25	39	15.4582			0.0526316
									3057	vegetables, peas, green peas, cooked from fresh	84	1.19	80	6.66157	0.0526316									3057	vegetables, peas, green peas, cooked from fresh	84	1.19	80	6.66157			0.0526316
									2964	vegetables, carrots, cooked from fresh	35	0.2	8.8	4.36	0.0526316									2964	vegetables, carrots, cooked from fresh	35	0.2	8.8	4.36			0.0526316
									3039	vegetables, okra, cooked from fresh	22	0.43	6.54	1.5071	0.0526316									3039	vegetables, okra, cooked from fresh	22	0.43	6.54	1.5071			0.0526316
									7229	vegetables, artichoke, regular globe - cooked	53	0.4	14	3.46818	0.0526316									7229	vegetables, artichoke, regular globe - cooked	53	0.4	14	3.46818			0.0526316
									7420	vegetables, corn, yellow, cooked from fresh, cob	96	0.62	43	6.87243	0.0526316									7420	vegetables, corn, yellow, cooked from fresh, cob	96	0.62	43	6.87243			0.0526316
									3033	vegetables, mushrooms, cooked from fresh	28	0.87	80	9.11181	0.0526316									3033	vegetables, mushrooms, cooked from fresh	28	0.87	80	9.11181			0.0526316
									2874	vegetables, asparagus, cooked from fresh	22	0.6	20	3.30303	0.0526316									2874	vegetables, asparagus, cooked from fresh	22	0.6	20	3.30303			0.0526316
									3022	vegetables, lettuce, iceberg	14	0.15	1.7	1.12303	0.0526316									3022	vegetables, lettuce, iceberg	14	0.15	1.7	1.12303			0.0526316
									3113	vegetables, spinach, cooked from fresh	23	0.76	7.3	0.951794	0.0526316									3113	vegetables, spinach, cooked from fresh	23	0.76	7.3	0.951794			0.0526316
									2972	vegetables, cauliflower, cooked from fresh	23	0.17	4.2	2.44813	0.0263158									2972	vegetables, cauliflower, cooked from fresh	23	0.17	4.2	2.44813			0.0263158
									3098	vegetables, pumpkin, cooked from fresh	20	0.23	11	4.73913	0.0175439									3098	vegetables, pumpkin, cooked from fresh	20	0.23	11	4.73913			0.0175439
									2951	vegetables, broccoli, cooked from fresh	35	0.45	17.63	3.88216	0.0263158									2951	vegetables, broccoli, cooked from fresh	35	0.45	17.63	3.88216			0.0263158
									3147	vegetables, squash, summer type (green or yellow), cooked from fresh	20	0.39	0	0	0.0175439									3147	vegetables, squash, summer type (green or yellow), cooked from fresh	20	0.39	0	0			0.0175439
Oranges, Mandarines	Default composition: 490 Oranges, 491 Orange juice, single strength, 492 Orange juice, concentrated, 495 Tangerines, mandarins, clem., 496 Tangerine Juice	2611			Oranges, mandarines	50	0.07			Oranges, mandarines	50	0.07	26.5	37.513	1			Orange, raw	47	0.1	0	0		NDSR	Oranges, tangerines	50	0.07	26.5			37.513	1		used NDSR Zn values; calculations and food weighting had already been done for the large composite groups and these are minimal sources of zinc and similar to/same as USDA Zn values	IML: most phytate for IML was assumed to be 0; used NDSR phytate values for all fruits and vegetables; discussed phytate values with NDSR via email exchange
				09200	ORANGES,RAW,ALL COMM VAR	47	0.07		5217	fruit, orange, fresh	47	0.07	3	4.24675	0.5									5217	fruit, orange, fresh	47	0.07	3	4.24675		4.24675	0.5
				09218	TANGERINES,(MANDARIN ORANGES),RAW	53	0.07		5175	fruit, mandarin orange, fresh	53	0.07	50	70.7792	0.5									5175	fruit, mandarin orange, fresh	53	0.07	50	70.7792		70.7792	0.5
Lemons, Limes	Default composition: 497 Lemons and limes, 498 Lemon juice, single strength, 499 Lemon juice, concentrated	2612			Lemons, Limes	29.5	0.085			Lemons, Limes	29.5	0.085	0	0	1			Lemon, raw	29	0.1	0	0		NDSR	lemons, limes	29.5	0.085	0			0	1		used NDSR Zn values; calculations and food weighting had already been done for the large composite groups and these are minimal sources of zinc and similar to/same as USDA Zn values	IML: most phytate for IML was assumed to be 0; used NDSR phytate values for all fruits and vegetables
				09150	LEMONS,RAW,WITHOUT PEEL	29	0.06		5155	fruit, lemon, fresh	29	0.06	0		0.5									5155	fruit, lemon, fresh	29	0.06	0				0.5
				09159	LIMES,RAW	30	0.11		5158	fruit, lime, fresh	30	0.11	0		0.5									5158	fruit, lime, fresh	30	0.11	0				0.5
Citrus, Other	Default composition: 512 Citrus fruit, nes, 513 Citrus juice, single strength, 514 Citrus juice, concentrated	2614			Citrus, other	38.2	0.076			Citrus, other	40.5	0.075	8.83	11.6663	1			Citrus, other	47	0.1	0	0		NDSR	Citrus, other	40.5	0.075	8.83			11.6663	1		used NDSR Zn values; calculations and food weighting had already been done for the large composite groups and these are minimal sources of zinc and similar to/same as USDA Zn values	IML: most phytate for IML was assumed to be 0; used NDSR phytate values for all fruits and vegetables
				09200	ORANGES,RAW,ALL COMM VAR	47	0.07		5175	fruit, mandarin orange, fresh	53	0.07	50	70.7792	0.166667									5175	fruit, mandarin orange, fresh	53	0.07	50	70.7792			0.166667
				09218	TANGERINES,(MANDARIN ORANGES),RAW	53	0.07		5217	fruit, orange, fresh	47	0.07	3	4.24675	0.166667									5217	fruit, orange, fresh	47	0.07	3	4.24675			0.166667
				09150	LEMONS,RAW,WITHOUT PEEL	29	0.06		5155	fruit, lemon, fresh	29	0.06	0	0	0.166667									5155	fruit, lemon, fresh	29	0.06	0	0			0.166667
				09159	LIMES,RAW	30	0.11		5158	fruit, lime, fresh	30	0.11	0	0	0.166667									5158	fruit, lime, fresh	30	0.11	0	0			0.166667
				09111	GRAPEFRUIT,RAW,PINK&RED&WHITE,ALL AREAS	32	0.07		33779	fruit, grapefruit, fresh, pink or red	42	0.07	0	0	0.333333									33779	fruit, grapefruit, fresh, pink or red	42	0.07	0	0			0.333333
Grapefruit	Default composition: 507 Grapefruit (inc. pomelos), 509 Juice of Grapefruit, 510 Grapefruit juice, concentrated	2613		09111	GRAPEFRUIT,RAW,PINK&RED&WHITE,ALL AREAS	32	0.07		33779	fruit, grapefruit, fresh, pink or red	42	0.07	0	0	1			grapefruit, raw, pink/red/white, all areas	32	0.07	0	0		NDSR 33779	fruit, grapefruit, fresh, pink or red	42	0.07	0			0	1		used NDSR Zn values (same as USDA) for all fruits and vegetables	IML: most phytate for IML was assumed to be 0; used NDSR phytate values for all fruits and vegetables
Bananas	Default composition: 486 Bananas	2615		09040	BANANAS,RAW	89	0.15		4974	fruit, banana, fresh or ripe	89	0.15	3.2	2.11394	1			Banana, raw, ripe	92	0.2	0	0		NDSR 4974	fruit, banana, fresh or ripe	89	0.15	3.2			2.11394	1		used NDSR Zn values (same as USDA) for all fruits and vegetables	IML: most phytate for IML was assumed to be 0; used NDSR phytate values for all fruits and vegetables
Plantains	Default composition: 489 Plantains	2616		09278	PLANTAINS,COOKED	116	0.13		5290	fruit, plantains, ripe (yellow), boiled or baked	116	0.13	8	6.0979	1			Plantain, ckd	116	0.1	0	0		NDSR 5290	fruit, plantains, ripe (yellow), boiled or baked	116	0.13	8			6.0979	1		used NDSR Zn values (same as USDA) for all fruits and vegetables	IML: most phytate for IML was assumed to be 0; used NDSR phytate values for all fruits and vegetables
Apples	Default composition: 515 Apples, 518 Apple juice, single strength, 519 Apple juice, concentrated	2617		09003	APPLES,RAW,WITH SKIN	52	0.04		4922	fruit, apple, fresh, with skin	52	0.04	65	161.023	1			Apple, raw	59	0	63			NDSR 4922	apple, fresh, with skin	52	0.04	65			161.023	1		used NDSR Zn values (same as USDA) for all fruits and vegetables	IML: most phytate for IML was assumed to be 0; used NDSR phytate values for all fruits and vegetables
Pineapples	Default composition: 574 Pineapples, 575 Pineapples Cand, 576 Juice of Pineapples, 580 Pineapple Juice Conc	2618		09266	PINEAPPLE,RAW,ALL VAR	50	0.12		5274	fruit, pineapple, fresh	50	0.12	0	0	1			pineapple, raw	49	0.1	0	0		NDSR 5274	fruit, pineapple, fresh	50	0.12	0			0	1		used NDSR Zn values (same as USDA) for all fruits and vegetables	IML: most phytate for IML was assumed to be 0; used NDSR phytate values for all fruits and vegetables
Dates	Default composition: 577 Dates	2619		09087	DATES,DEGLET NOOR	282	0.29		5095	fruit, dates	282	0.29	108	36.9028	1			Date	279	0.3	0	0		NDSR 5095	fruit, dates	282	0.29	108			36.9028	1		used NDSR Zn values (same as USDA) for all fruits and vegetables	IML: most phytate for IML was assumed to be 0; used NDSR phytate values for all fruits and vegetables
Grapes	Default composition: 560 Grapes, 561 Raisins, 562 Grape Juice, 563 Must of Grapes	2620		09132	GRAPES,RED OR GRN (EURO TYPE,SUCH AS THOMPSON SEEDLESS),RAW	69	0.07		10802	fruit, grapes, fresh	69	0.07	7.2	10.1922	1			Grape	59	0	63			NDSR 10802	fruit, grapes, fresh	69	0.07	7.2			10.1922	1		used NDSR Zn values (same as USDA) for all fruits and vegetables	IML: most phytate for IML was assumed to be 0; used NDSR phytate values for all fruits and vegetables
Fruits, Other	Default composition: 521 Pears, 523 Quinces, 526 Apricots, 527 Dry Apricots, 530 Sour cherries, 531 Cherries, 534 Peaches and nectarines, 536 Plums and sloes, 537 Plums Dried (Prunes), 538 Plum juice, single strength, 539 Plum juice, concentrated, 541 Stone fruit, nes, 542 Pome fruit, nes, 544 Strawberries, 547 Raspberries, 549 Gooseberries, 550 Currants, 552 Blueberries, 554 Cranberries, 558 Ber…	2625								Fruits, other	66.6667	0.178417	21.3958	11.883	1			Fruits, other	56.25	0.116842	16.3571	13.8721		NDSR	Fruits, other	66.6667	0.178417	21.3958			11.883	1		used NDSR Zn values; calculations and food weighting had already been done for the large composite groups and these are minimal sources of zinc and similar to/same as USDA Zn values	IML: most phytate for IML was assumed to be 0; used NDSR phytate values for all fruits and vegetables
									5328	fruit, raspberries, fresh, red	52	0.42	6.5	1.53355	0.0416667									5328	fruit, raspberries, fresh, red	52	0.42	6.5	1.53355		1.53355	0.0416667
									4954	fruit, apricot, fresh	48	0.2	0	0	0.0416667									4954	fruit, apricot, fresh	48	0.2	0	0		0	0.0416667
									5116	fruit, gooseberries, fresh	44	0.12	6.5	5.36742	0.0416667									5116	fruit, gooseberries, fresh	44	0.12	6.5	5.36742		5.36742	0.0416667
									5092	fruit, currants, dried	283	0.66	12	1.80165	0.0416667									5092	fruit, currants, dried	283	0.66	12	1.80165		1.80165	0.0416667
									5017	fruit, blueberries, fresh	57	0.16	3	1.85795	0.0416667									5017	fruit, blueberries, fresh	57	0.16	3	1.85795		1.85795	0.0416667
									5085	fruit, cranberries, fresh	46	0.1	2	1.98182	0.0416667									5085	fruit, cranberries, fresh	46	0.1	2	1.98182		1.98182	0.0416667
									5387	fruit, watermelon, fresh	30	0.1	2.9	2.87364	0.0416667									5387	fruit, watermelon, fresh	30	0.1	2.9	2.87364		2.87364	0.0416667
									5034	fruit, cantaloupe, fresh	34	0.18	46.1	25.3783	0.0416667									5034	fruit, cantaloupe, fresh	34	0.18	46.1	25.3783		25.3783	0.0416667
									5102	fruit, figs, fresh	74	0.15	30	19.8182	0.0416667									5102	fruit, figs, fresh	74	0.15	30	19.8182		19.8182	0.0416667
									5182	fruit, mango, fresh	65	0.04	26	64.4091	0.0416667									5182	fruit, mango, fresh	65	0.04	26	64.4091		64.4091	0.0416667
									27431	fruit, mangosteen, fresh	73	0.032	129	399.46	0.0416667									27431	fruit, mangosteen, fresh	73	0.032	129	399.46		399.46	0.0416667
									11137	fruit, guava (guayaba), fresh common	68	0.23	0	0	0.0416667									11137	fruit, guava (guayaba), fresh common	68	0.23	0	0		0	0.0416667
									5252	fruit, pear, fresh	58	0.1	0	0	0.0416667									5252	fruit, pear, fresh	58	0.1	0	0		0	0.0416667
									4971	fruit, avocado, black skin - California type	167	0.68	141	20.5468	0.0416667									4971	fruit, avocado, black skin - California type	167	0.68	141	20.5468		20.5468	0.0416667
									5272	fruit, persimmon - fresh	70	0.11	65	58.5537	0.0416667									5272	fruit, persimmon - fresh	70	0.11	65	58.5537		58.5537	0.0416667
									5150	fruit, kiwi fruit, green	61	0.14	6.5	4.60065	0.0416667									5150	fruit, kiwi fruit, green	61	0.14	6.5	4.60065		4.60065	0.0416667
									5221	fruit, papaya, fresh	39	0.07	26	36.8052	0.0416667									5221	fruit, papaya, fresh	39	0.07	26	36.8052		36.8052	0.0416667
									107581	fruit, quince (raw)	57	0.04	0	0	0.0416667									107581	fruit, quince (raw)	57	0.04	0	0		0	0.0416667
									5040	fruit, cherries, fresh, sweet	63	0.07	0	0	0.0416667									5040	fruit, cherries, fresh, sweet	63	0.07	0	0		0	0.0416667
									110396	fruit, cherries, fresh, sour	50	0.1	0	0	0.0416667									110396	fruit, cherries, fresh, sour	50	0.1	0	0		0	0.0416667
									5230	fruit, peach, fresh	39	0.17	0	0	0.0416667									5230	fruit, peach, fresh	39	0.17	0	0		0	0.0416667
									11322	fruit, nectarine - fresh	44	0.17	0	0	0.0416667									11322	fruit, nectarine - fresh	44	0.17	0	0		0	0.0416667
									5300	fruit, plum, fresh	46	0.1	0	0	0.0416667									5300	fruit, plum, fresh	46	0.1	0	0		0	0.0416667
									5363	fruit, strawberries, fresh	32	0.14	11	7.78571	0.0416667									5363	fruit, strawberries, fresh	32	0.14	11	7.78571		7.78571	0.0416667
Cocoa Beans	Default composition: 661 Cocoa beans, 662 Cocoa Paste, 665 Cocoapowder and Cake, 666 Chocolate Prsnes	2633		19165	COCOA,DRY PDR,UNSWTND	228	6.81		1762	ingredient, cocoa powder, unsweetened	228	6.81	1901	27.6611	1		7051	Cocoa powder	229	6.8	1880	27.3957		NDSR 1762	ingredient, cocoa powder, unsweetened	228	6.81	1901			27.6611	1		USDA, IML and NDSR values are all the same	IML data from Oberleas &Harland, 1981 (similar to NDSR); retain NDSR values for all stimulants
Coffee	Default composition: 656 Coffee, green, 657 Coffee Roasted, 659 Coffee Extracts	2630		14215	COFFEE,INST,REG,PREP W/H2O	2	0.01		7772	beverages, coffee, regular (caffeinated), made from ground	1	0.02	7	34.6818	1		800	Coffee beverage, prepared	2	0	6			NDSR 7772	beverages, coffee, regular (caffeinated), made from ground	1	0.02	7			34.6818	1		USDA, IML and NDSR values are similar	Retain NDSR phytate values for all stimulants
Tea	Default composition: 667 Tea, 671 Maté, 672 Extracts Tea, Mate, Prep	2635		14355	TEA,BREWED,PREP W/TAP H2O	1	0.02		250	beverages, tea, brewed (from tea leaves or tea bag) - all flavors or plain, regular, unsweetened	1	0.02	2	9.90909	1		2277	Tea beverage, prepared	1	0	0			NDSR 250	beverages, tea, brewed (from tea leaves or tea bag) - all flavors or plain, regular, unsweetened	1	0.02	2			9.90909	1		USDA, IML and NDSR values are all similar	Retain NDSR phytate values for all stimulants
Pepper	Default composition: 687 Pepper (Piper spp.)	2640		02030	PEPPER,BLACK	251	1.19		2784	spices, pepper (ground), black	255	1.42	277	19.3297	1		WFOOD 200120	Pepper, black, spice	324	4.1	0	0		NDSR 2784	spices, pepper (ground), black	255	1.42	277			19.3297	1		Zn values quite different among USDA, IML, NDSR; retained NDSR values for all spices	IML changed to reflect black pepper (from Wuehler 2005), IML phytate value source not documented; Spice data limited in Reddy 2002, minor food source; used NDSR data for all
Pimento	Default composition: 689 Chillies and peppers, dry	2641		02031	PEPPER,RED OR CAYENNE	318	2.48		2754	spices, cayenne	318	2.48	68	2.71701	1		7103	Pepper, red, pungent, dry pwd	318	2.5	403	15.9735		NDSR 2754	spices, cayenne	318	2.48	68			2.71701	1		Pimento = cayenne, dried red peppers, changed from Wuehler 2005; all database Zn values are the same; used NDSR values for all spices	Pimento = cayenne, dried red peppers, changed from Wuehler 2005; used NDSR; changed IML values to reflect cayenne pepper; IML phytate value source not documented; Spice data limited in Reddy 2002, minor food source; used NDSR data for all species
Cloves	Default composition: 698 Cloves	2642		02011	CLOVES,GROUND	323	1.09		2760, phytate imputed	spices, cloves (ground)	323	1.09	120.97	10.9973	1		WFOOD M07	Cloves	261	2	0	0		NDSR 2760	spices, cloves (ground)	323	1.09	120.97			10.9973	1		NDSR and USDA Zn values are the same; IML Zn values are higher; used NDSR values for all spices	NDSR did not have phytate value for cloves, IML value was assumed to be 0; imputed based on P:Zn ratio of "spices, other" category
Spices, Other	Default composition: 692 Vanilla, 693 Cinnamon (canella), 702 Nutmeg, mace and cardamoms, 711 Anise, badian, fennel, corian., 720 Ginger, 723 Spices, nes	2645			Spices, other					Spices, other	315.25	3.77875	419.375	10.9974	1			Spices, other	219	1.1025	0	0		NDSR	Spices, other	315.25	3.77875	419.375			10.9974	1		Unknown composition of composite Zn category from IML (Wuehler 2005); used NDSR values for all spices	IML value was assumed to be 0; Reddy 2002 only includes corriander seed ; used NDSR data for all spices
									18447	spices, coriander, seed	298	4.7	838	17.6677	0.25									18447	spices, coriander, seed	298	4.7	838	17.6677			0.25
									29616	spices, fennel seed	345	3.7	809	21.6661	0.125									29616	spices, fennel seed	345	3.7	809	21.6661			0.125
									2772	spices, ginger (ground)	347	4.72	290	6.08821	0.25									2772	spices, ginger (ground)	347	4.72	290	6.08821			0.25
									1907	ingredient, vanilla extract	288	0.11	0	0	0.25									1907	ingredient, vanilla extract	288	0.11	0	0			0.25
									29612	spices, cardamom (ground)	311	7.47	290	3.8469	0.125									29612	spices, cardamom (ground)	311	7.47	290	3.8469			0.125
Beer	Default composition: 51 Beer of Barley	2656		14003	ALCOHOLIC BEV,BEER,REG,ALL	43	0.01		149	beverages, beer, regular	43	0.01	0	0	1			Beer, commercial, 4% alcohol	41	0	0			14003 USDA	ALCOHOLIC BEV,BEER,REG,ALL	43	0.01	0			0	1		USDA, IML and NDSR values are all similar; used USDA values for Zn	Assume phytate = 0 for alcohol
Beverages, Alcoholic	Default composition: 634 Bever. Dist.Alc	2658		14533	ALCOHOLIC BEV,DISTILLED,ALL 100 PROOF	295	0.04		8197	beverages, liquor, whiskey, plain	231	0.04	0	0	1			Distilled spirits, 50% alcohol	295	0	0			14533 USDA	ALCOHOLIC BEV,DISTILLED,ALL 100 PROOF	295	0.04	0				1		USDA, IML and NDSR values are all similar; used USDA values for Zn	Assume phytate = 0 for alcohol
Beverages, Fermented	Default composition: 26 Wheat Fermented Beverage, 39 Rice Fermented Beverages, 66 Beer of Maize, 82 Beer of Millet, 86 Beer of Sorghum, 517 Cider Etc	2657		14003	ALCOHOLIC BEV,BEER,REG,ALL	43	0.01		149	beverages, beer, regular	43	0.01	0	0	1			Beer, made from millet	41	0	0			14003 USDA	ALCOHOLIC BEV,BEER,REG,ALL	43	0.01	0				1		USDA, IML and NDSR values are all similar; used USDA values for Zn	Assume phytate = 0 for alcohol
Wine	Default composition: 564 Wine, 565 Vermouths and Similar	2655		14084	ALCOHOLIC BEV,WINE,TABLE,ALL	83	0.13			Wine	83.5	0.13	0	0	1			Wine, table 11.5% alcohol	70	0.1	0	0		14084 USDA	ALCOHOLIC BEV,WINE,TABLE,ALL	83.5	0.13	0			0	1		USDA, IML and NDSR values are all similar; used USDA values for Zn	Assume phytate = 0 for alcohol
									103900	beverages, wine, other table (<15% alcohol), white	82	0.12	0	0	0.5
									147	beverages, wine, other table (<15% alcohol), red	85	0.14	0	0	0.5
Bovine Meat	Default composition: 867 Cattle meat, 870 Meat-CattleBoneless(Beef and Veal), 872 Meat of Beef,Drd, Sltd,Smkd, 873 Meat Extracts, 874 Sausage Beef and Veal, 875 Preparations of Beef Meat, 876 Beef canned, 877 Homogen.Meat Prp., 947 Buffalo meat	2731		13796	Beef, composite of trimmed retial cuts, separable lean and fat, trimmed to 1/8"fat, all grades, cooked	291	6			Bovine meat	309.5	5.82	0	0	1		8067	Beef, medium fat, cooked, roasted	269	4.1	0	0		USDA 13796	Beef, composite of trimmed retial cuts, separable lean and fat, trimmed to 1/8"fat, all grades, cooked	291	6	0				1		IML Zn value is USDA 0.86 x USDA # 13418 (Beef, very thin) plus 0.14 x USDA # 4001 (Beef fat); USDA value is composite of trimmed retail cuts, cooked (did not used carcass values becaused this contains offal); raw = 234kcal , 3.75mg Zn (ratio of kcal:Zn is much higher in cooked product ?); used USDA Zn values for cooked product	Assume phytate =0 for all animal source foods
									6375	beef, hamburger or ground beef, 20% fat (80% lean meat)	254	6.24	0	0	0.5
									6453	beef, roast, rib, visible fat eaten	365	5.4	0	0	0.5
Mutton & Goat Meat	Default composition: 977 Sheep meat, 1017 Goat meat	2732		17281	Lamb, Australian, imported, fresh, composite of trimmed retail cuts, separable lean and fat, trimmed to 1/8"fat, cooked	256	4.68			Mutton & Goat Meat	254	4.85	0	0	1			Mutton & Goat Meat	269	4.1	0	0		USDA 17281	Lamb, Australian, imported, fresh, composite of trimmed retail cuts, separable lean and fat, trimmed to 1/8"fat, cooked	256	4.68	0				1		IML Zn values for mutton and goat are for bovine meat; USDA,17281 (Australia) cooked chosen becaused highest mutton/goat consuming areas are Australia and Pacific islands, and all grades are included (US data is for choice only); did not used goat meat values for USDA becaused could only find 2 documented sources in the literature and the most common consumption areas are Australia/Pacific Island…	Assume phytate =0 for all animal source foods
									1934	lamb, ground	276	5.23	0		0.5
									1945	lamb, roast, leg, visible fat eaten	232	4.47	0		0.5
Pigmeat	Default composition: 1035 Pig meat, 1038 Pork, 1039 Bacon and Ham, 1041 Sausages of Pig Meat, 1042 Prep of Pig Meat	2733		10188	Pork, fresh composite of trimmed leg, loin, shoulder and spareribs, separable lean and fat, cooked	238	3.06			Pigmeat	270.5	2.85	0	0	1		1683	Pork, fresh, roasted	273	2.9	0	0		USDA 10188	Pork, fresh composite of trimmed retail cuts( leg, loin, shoulder and spareribs), separable lean and fat, cooked	238	3.06	0				1		IML composite category of unknown composition (Wuehler 2005); USDA 10003 Zn value is composite of trimmed retail cuts, cooked; raw : 211kcal, 2.27mg Zn (ratio of kcal:Zn is much higher in cooked product?); used USDA Zn values for cooked product	Assume phytate =0 for all animal source foods
									2363	pork, roast, fresh, loin, visible fat eaten	252	2.64	0	0	0.5
									2307	pork, ground	289	3.06	0	0	0.5
Poultry Meat	Default composition: 1058 Chicken meat, 1060 Fat Liver Prep (Foie Gras), 1061 Meat of Chicken Canned, 1069 Duck meat, 1073 Goose and guinea fowl meat, 1080 Turkey meat	2734			Poultry Meat	268.25	2.2225			Poultry Meat	231.352	2.35	0	0	1			Poultry Meat	243.75	1.875	0	0		USDA 05112, 05166, 05140, 05147	Poultry Meat	268.25	2.22	0				1		IML composite category of unknown composition; USDA Zn value are the mean ofchicken and turkey (meat and skin, cooked, roasted) from USDA; data on poultry in USDA missing or limited (goose and duck, 0 data points, direction of kcal:Zn ratio of raw vs. cooked different ); very similar to values from NDSR for composite of all 5 poultry. Ratio of kcal:Zn is much higher in the cooked product?; used U…	Assume phytate =0 for all animal source foods
				5112	Chicken, roasting, meat and skin, cooked, roasted	223	1.45		12941	poultry, chicken, whole chicken, skin eaten	239	1.94	0	0	0.25									USDA 05112	Chicken, roasting, meat and skin, cooked, roasted	223	1.45	0				0.25
				5166	Turkey, all classes, meat and skin, cooked and roasted	208	2.96		12399	poultry, turkey, light & dark meat - unknown parts, skin eaten	207	2.68	0	0	0.25									USDA 05166	Turkey, all classes, meat and skin, cooked and roasted	208	2.96	0				0.25
				5140	Duck, domesticated, meat and skin, cooked, roasted (no data points in USDA)	337	1.86		6315	poultry, duck, domestic, whole, skin eaten	207.409	2.785	0	0	0.25									USDA 05140	Duck, domesticated, meat and skin, cooked, roasted (no data points in USDA)	337	1.86	0				0.25
				5147	Goose, domesticated, meat and skin, cooked, roasted (no data points in USDA)	305	2.62		6320	poultry, goose, skin eaten	305	2.62	0	0	0.125									USDA 05147	Goose, domesticated, meat and skin, cooked, roasted (no data points in USDA)	305	2.62	0				0.25
									6325	poultry, guinea hen, skin eaten	239	1.37	0	0	0.125
Meat, Other	Default composition: 1089 Bird meat, nes, 1097 Horse meat, 1108 Meat of Asses, 1111 Meat of Mules, 1127 Camel meat, 1141 Rabbit meat, 1151 Meat of Other Rod, 1158 Meat Oth Camelids, 1163 Game meat, 1164 Meat Dried Nes, 1166 Meat nes, 1172 Prepared Meat Nes, 1176 Snails, Not Sea	2735			Meat, Other	216.75	2.675			Meat, other	192.25	2.5525	0	0	1			Meat, Other	134.5	2.235	0	0		USDA 05140, 17171, 17178, 17165	Meat, Other	207	2.11	0				1		IML composite category of unknown compsition; USDA is mean of game meat Zn values for USDA (missing/limited); (ratio of kcal:Zn is much higher in cooked product?); used USDA Zn values for cooked product	Assume phytate =0 for all animal source foods
				17171	Game meat, horse, cooked, roasted	175	3.82		12727	poultry, duck, wild, skin eaten	239	1.37	0	0	0.25									USDA 5140	Duck, domesticated, meat and skin, cooked, roasted (no data points in USDA)	337	1.86					0.25
				17178	Game meat, rabbit, domesticated, composite of cuts, cooked, roasted	197	2.27		10791	game, horsemeat	175	3.82	0	0	0.25									USDA 17171	Game meat, horse, cooked, roasted	175	3.82					0.25
				17165	Game meat, deer, cooked, roasted	158	2.75		7172	game, rabbit or hare, domestic	197	2.27	0	0	0.25									USDA 17178	Game meat, rabbit, domesticated, composite of cuts, cooked, roasted	197	2.27					0.25
				5140	Duck, domesticated, meat and skin, cooked, roasted (no data points in USDA)	337	1.86		7156	game, venison or deer, roast	158	2.75	0	0	0.25									USDA 17165	Game meat, deer, cooked, roasted	158	2.75					0.25
Offals, Edible	Default composition: 868 Offals of Cattle, Edible, 878 Liver Prep., 948 Offals of Buffaloes,Edible, 978 Offals of Sheep,Edible, 1018 Offals of Goats, Edible, 1036 Offals of Pigs, Edible, 1059 Offals Liver Chicken, 1074 Offals Liver Geese, 1075 Offals Liver Duck, 1081 Offals Liver Turkeys, 1098 Offals of Horses, 1128 Offals of Camels,Edible, 1159 Offals Other Camelids, 1167 Offals Nes	2736			Offals, Edible					Offals, Edible	183.542	3.4306	0	0	1			Offals, edible	151.75	4.35	0	0		NDSR	Offals, edible	183.542	3.4306	0			0	1		IML composite category of unknown composition; used NDSR composite category for Zn values (similar to USDA)	Assume phytate =0 for all animal source foods
									6393	beef, organ meats, heart	165	2.87	0		0.0357143									6393	beef, organ meats, heart	165	2.87	0				0.0357143
									6392	beef, organ meats, brains	151	1.09	0		0.0357143									6392	beef, organ meats, brains	151	1.09	0				0.0357143
									6394	beef, organ meats, kidney	158	2.84	0		0.0357143									6394	beef, organ meats, kidney	158	2.84	0				0.0357143
									6395	beef, organ meats, liver	191	5.3	0		0.0357143									6395	beef, organ meats, liver	191	5.3	0				0.0357143
									6397	beef, organ meats, sweetbreads	319	2.2	0		0.0357143									6397	beef, organ meats, sweetbreads	319	2.2	0				0.0357143
									6398	beef, organ meats, tongue	284	4.09	0		0.0357143									6398	beef, organ meats, tongue	284	4.09	0				0.0357143
									6399	beef, organ meats, tripe or stomach	94	1.71	0		0.0357143									6399	beef, organ meats, tripe or stomach	94	1.71	0				0.0357143
									6161	lamb, organ meats, brains	145	1.36	0		0.0416667									6161	lamb, organ meats, brains	145	1.36	0				0.0416667
									6163	lamb, organ meats, kidney	137	3.8	0		0.0416667									6163	lamb, organ meats, kidney	137	3.8	0				0.0416667
									1935	lamb, organ meats, heart	185	3.68	0		0.0416667									1935	lamb, organ meats, heart	185	3.68	0				0.0416667
									1936	lamb, organ meats, liver	220	7.89	0		0.0416667									1936	lamb, organ meats, liver	220	7.89	0				0.0416667
									1937	lamb, organ meats, sweetbreads	125	2.13	0		0.0416667									1937	lamb, organ meats, sweetbreads	125	2.13	0				0.0416667
									1938	lamb, organ meats, tongue	275	2.99	0		0.0416667									1938	lamb, organ meats, tongue	275	2.99	0				0.0416667
									2338	pork, organ meats, brains	138	1.48	0		0.0357143									2338	pork, organ meats, brains	138	1.48	0				0.0357143
									2339	pork, organ meats, chitterlings (chitlins)	233	1.85	0		0.0357143									2339	pork, organ meats, chitterlings (chitlins)	233	1.85	0				0.0357143
									2340	pork, organ meats, heart	148	3.09	0		0.0357143									2340	pork, organ meats, heart	148	3.09	0				0.0357143
									2341	pork, organ meats, kidneys	151	4.15	0		0.0357143									2341	pork, organ meats, kidneys	151	4.15	0				0.0357143
									2342	pork, organ meats, liver	165	6.72	0		0.0357143									2342	pork, organ meats, liver	165	6.72	0				0.0357143
									2343	pork, organ meats, stomach or hog maws	157	2.92	0		0.0357143									2343	pork, organ meats, stomach or hog maws	157	2.92	0				0.0357143
									2344	pork, organ meats, tongue	271	4.53	0		0.0357143									2344	pork, organ meats, tongue	271	4.53	0				0.0357143
									6299	poultry, chicken, giblets	157	4.23	0		0.125									6299	poultry, chicken, giblets	157	4.23	0				0.125
									6626	poultry, turkey, giblets	199	3.12	0		0.125									6626	poultry, turkey, giblets	199	3.12	0				0.125
Fats, Animals, Raw	Default composition: 869 Fat of Cattle, 871 Cattle Butch.Fat, 949 Fat of Buffaloes, 979 Fat of Sheep, 994 Grease incl. Lanolin Wool, 1019 Fat of Goats, 1037 Fat of Pigs, 1040 Pig Butcher Fat, 1043 Lard, 1065 Fat of Poultry, 1066 Fat of Ptry Rend, 1129 Fat of Camels, 1160 Fat Other Camelids, 1168 Oils,Fats of Animal Nes, 1221 Lard Stearine Oil, 1222 Degras, 1225 Tallow, 1243 Fat Prep Nes	2737			Fats, animal, raw	901.5	0.0275			Fats, animals, raw	767	0.82	0	0	1		1241	Lard	902	0.1	0	0		USDA 04002, 04001, 04520, 04542	Animal fats: lard, beef tallow, mutton tallow, chicken fat	901.5	0.0275	0			0	1		IML Zn value is for lard (rendered and clarified fat) only; NDSR Zn value is a composite of beef, chicken/turkey, fowl, lamb and pork animal fats; for some animals, one is unable to obtain pure fat when butchering (NDSR communication) becaused of they way it is cut from the muscle (and therefore contains more Zn) becaused of the way they are cut from the muscle...unable to obtain pure fat when bu…	Assume phytate =0 for all animal source foods
				04002	Lard	902	0.11		1192	fats, lard	902	0.11	0	0	0.25									04002	Lard	902	0.11					0.25
				04001	Beef tallow	902	0		1194	fats, animal, beef	680	1.24	0	0	0.25									04001	Beef tallow	902	0					0.25
				04520	Mutton tallow	902	0		1195	fats, animal, chicken or turkey	900	0.19	0	0	0.25									04520	Mutton tallow	902	0					0.25
				04542	Fat, chicken	900	0		1197	fats, animal, lamb	586	1.74	0	0	0.25									04542	Fat, chicken	900	0					0.25
Milk, Whole		2738		01077	MILK,WHL,3.25% MILKFAT,W/ ADDED VITAMIN D	61	0.37		4338	milk, whole (3.5 - 4% fat)	61	0.37	0	0	1		1320	MILK, COW, WHOLE, NOT FORTIFIED	66	0.4	0	0		USDA 01211	Milk, whole, 3.25% milkfat, without added Vitamin A and Vitamin D	61	0.37	0			0	1		Zn values among databases are similar; used USDA Zn values	Assume phytate =0 for all animal source foods
Butter, Ghee	Default composition: 886 Butter Cow Milk, 887 Ghee,Butteroil of Cow Milk, 952 Butter of Bufmilk, 953 Ghee Oil of Buf, 983 Butter,Ghee of Sheep Milk, 1022 Butter of Goat Mlk	2740		01145	BUTTER,WITHOUT SALT	717	0.09		1595	fats, butter, regular, unsalted	717	0.09	0	0	1		WFOOD 735	butter, cow, uncooked	710	0	0			USDA 01145	BUTTER,WITHOUT SALT	717	0.09	0			0	1		Zn values among databases are similar; IML database has been updated to include butter, not ghee (Wuehler 2005); used USDA Zn values	Assume phytate =0 for all animal source foods
Cream	Default composition: 885 Cream Fresh	2743		01050	CREAM,FLUID,LT (COFFEE CRM OR TABLE CRM)	195	0.27		3662	cream, light (coffee cream or table cream, 20% fat)	195	0.27	0	0	1		WFOOD LD11	CREAM, 20% FAT	203	0.3	0	0		USDA 01050	CREAM,FLUID,LT (COFFEE CRM OR TABLE CRM), ~20%	195	0.27	0			0	1		Zn values among databases are similar; used USDA Zn values	Assume phytate =0 for all animal source foods
Eggs	Default composition: 1062 Hen eggs, in shell, 1063 Eggs Liquid, 1064 Eggs Dried, 1091 Other bird eggs,in shell; nutrient data only: 916 Egg Albumine	2744		01129	EGG, CKD. Hardboiled	155	1.05		14953	eggs, whole, cooked	155	1.05	0	0	1		974	EGG, CHICKEN, RAW OR COOKED I	155	1.1	0	0		USDA 01129	EGG, CKD, HARD BOILED	155	1.05	0			0	1		Zn values among databases are similar; used USDA Zn values	Assume phytate =0 for all animal source foods
Honey	Default composition: 1182 Natural honey	2745		19296	HONEY	304	0.22		2801	sweeteners, honey	304	0.22	0	0	1		1134	Honey	304	0.2	0	0		USDA 19296	HONEY	304	0.22	0			0	1		Zn values among databases are similar; used USDA Zn values	Assume phytate =0 for all animal source foods
Freshwater Fish	Default composition: 1501 Frwtr Diad F, 1502 Frwtr Fz Whl, 1503 Frwtr Fillet, 1504 Frwtr Fz Flt, 1505 Frwtr Cured, 1506 Frwtr Canned, 1507 Frwtr Pr nes, 1508 Frwtr Meals	2761			Freshwater fish	145	1.155			Freshwater fish	139.5	1.265	0	0	1			Freshwater fish	123	1.2	0	0		NDSR	Carp, Tilapia	139.5	1.265	0			0	1		IML composite category of unknown composition; NDSR Zn values similar to USDA, with additional corrections for raw vs. cooked values; used NDSR Zn values for all fish/aquatic species	Assume phytate =0 for all animal source foods
				15009	CARP,COOKED,DRY HEAT	162	1.9		9084	fish and seafood, carp, cooked from fresh or frozen	162	1.9	0	0	0.5									NDSR 9084	fish and seafood, carp, cooked from fresh or frozen	162	1.9	0				0.5
				15262	Tilapia, ckd, dry heat	128	0.41		22696	fish and seafood, tilapia	117	0.63	0	0	0.5									NDSR 22696	fish and seafood, tilapia	117	0.63	0				0.5
Demersal Fish	Default composition: 1514 Dmrsl Fresh, 1515 Dmrsl Fz Whl, 1516 Dmrsl Fillet, 1517 Dmrsl Fz Flt, 1518 Dmrsl Cured, 1519 Dmrsl Canned, 1520 Dmrsl Pr nes, 1521 Dmrsl Meals	2762			Demersal fish	115.333	0.48			Demersal fish	130.667	0.626667	0	0	1			Demersal fish	112	0.516667	0	0		NDSR	Demersal fish	130.667	0.626667	0			0	1		IML composite category of unknown composition; NDSR Zn values similar to USDA, with additional corrections for raw vs. cooked values; used NDSR Zn values for all fish/aquatic species	Assume phytate =0 for all animal source foods
				15016	COD,ATLANTIC,CKD,DRY HEAT	105	0.58		9097	fish and seafood, cod, cooked from fresh or frozen, Atlantic	117	0.63	0	0	0.333333									9097	fish and seafood, cod, cooked from fresh or frozen, Atlantic	117	0.63	0				0.333333
				15037	HALIBUT,ATLANTIC&PACIFIC,CKD,DRY HEAT	111	0.43		9166	fish and seafood, halibut, cooked from fresh or frozen, Atlantic	117	0.63	0	0	0.333333									9166	fish and seafood, halibut, cooked from fresh or frozen, Atlantic	117	0.63	0				0.333333
				15095	SHARK,MIXED SPECIES,RAW	130	0.43		9591	fish and seafood, shark	158	0.62	0	0	0.333333									9591	fish and seafood, shark	158	0.62	0				0.333333
Pelagic Fish	Default composition: 1527 Pelagic Frsh, 1528 Pelgc Fz Whl, 1529 Pelgc Fillet, 1530 Pelgc Fz Flt, 1531 Pelgc Cured, 1532 Pelgc Canned, 1533 Pelgc Pr nes, 1534 Pelgc Meals	2763								Pelagic fish	149	0.766667	0	0	1			Pelagic fish	111.2	0.44	0	0		NDSR	Pelagic fish	149	0.766667	0			0	1		IML composite category of unknown composition; NDSR Zn values similar to USDA, with additional corrections for raw vs. cooked values; used NDSR Zn values for all fish/aquatic species	Assume phytate =0 for all animal source foods
									9171	fish and seafood, herring, cooked from fresh or frozen, Atlantic	203	1.27	0	0	0.166667									9171	fish and seafood, herring, cooked from fresh or frozen, Atlantic	203	1.27	0	0			0.166667
									9462	fish and seafood, sardines, cooked from fresh or frozen	182	0.82	0	0	0.166667									9462	fish and seafood, sardines, cooked from fresh or frozen	182	0.82	0	0			0.166667
									17303	fish and seafood, anchovy, cooked from fresh or frozen	158	0.62	0	0	0.166667									17303	fish and seafood, anchovy, cooked from fresh or frozen	158	0.62	0	0			0.166667
									9643	fish and seafood, tuna, cooked from fresh or frozen, skipjack	117	0.63	0	0	0.25									9643	fish and seafood, tuna, cooked from fresh or frozen, skipjack	117	0.63	0	0			0.25
									9067	fish and seafood, bonito, cooked from fresh or frozen	117	0.63	0	0	0.25									9067	fish and seafood, bonito, cooked from fresh or frozen	117	0.63	0	0			0.25
Marine Fish, Other	Default composition: 1540 Marine nes F, 1541 Marin Fz Whl, 1542 Marin Fillet, 1543 Marin Fz Flt, 1544 Marin Cured, 1545 Marin Canned, 1546 Marin Pr nes, 1547 Marin Meals	2764			Marine fish, other					Marine fish, other	155.963	0.754815	0	0	1			Marine Fish, other	115.456	0.571111	0	0		NDSR	Marine fish, other	155.963	0.754815	0	0	1	0	1		" Marine fish, other" is a combination of pelagic, demersal and diadramous fish (according to FISHSTAT; most unspecified landings are pelagic, but this is a even division), updated IML database (Wuehler 2005); IML composite category of unknown composition; NDSR Zn values similar to USDA, with additional corrections for raw vs. cooked values; used NDSR Zn values for all fish/aquatic species; used …	Assume phytate =0 for all animal source foods
									9097	fish and seafood, cod, cooked from fresh or frozen, Atlantic	117	0.63	0	0	0.111111			Diadramous Fish	123.167	0.756667	0	0		9097	fish and seafood, cod, cooked from fresh or frozen, Atlantic	117	0.63	0	0	0.111111		0.111111
									9166	fish and seafood, halibut, cooked from fresh or frozen, Atlantic	117	0.63	0	0	0.111111			Demersal fish	112	0.516667	0	0		9166	fish and seafood, halibut, cooked from fresh or frozen, Atlantic	117	0.63	0	0	0.111111		0.111111
									9591	fish and seafood, shark	158	0.62	0	0	0.111111			Pelagic fish	111.2	0.44	0	0		9591	fish and seafood, shark	158	0.62	0	0	0.111111		0.111111
									9447	fish and seafood, salmon, cooked from fresh or frozen, coho (silver)	158	0.62	0	0	0.037037									9447	fish and seafood, salmon, cooked from fresh or frozen, coho (silver)	158	0.62	0	0	0.037037		0.037037
									9631	fish and seafood, trout, cooked from fresh or frozen, brown	150	0.88	0	0	0.037037									9631	fish and seafood, trout, cooked from fresh or frozen, brown	150	0.88	0	0	0.037037		0.037037
									9603	fish and seafood, smelt - rainbow	150	0.88	0	0	0.037037									9603	fish and seafood, smelt - rainbow	150	0.88	0	0	0.037037		0.037037
									9588	fish and seafood, shad - American	262	0.94	0	0	0.111111									9588	fish and seafood, shad - American	262	0.94	0	0	0.111111		0.111111
									9616	fish and seafood, sturgeon, cooked from fresh or frozen	150	0.88	0	0	0.111111									9616	fish and seafood, sturgeon, cooked from fresh or frozen	150	0.88	0	0	0.111111		0.111111
									9171	fish and seafood, herring, cooked from fresh or frozen, Atlantic	203	1.27	0	0	0.0555556									9171	fish and seafood, herring, cooked from fresh or frozen, Atlantic	203	1.27	0	0	0.0555556		0.0555556
									9462	fish and seafood, sardines, cooked from fresh or frozen	182	0.82	0	0	0.0555556									9462	fish and seafood, sardines, cooked from fresh or frozen	182	0.82	0	0	0.0555556		0.0555556
									17303	fish and seafood, anchovy, cooked from fresh or frozen	158	0.62	0	0	0.0555556									17303	fish and seafood, anchovy, cooked from fresh or frozen	158	0.62	0	0	0.0555556		0.0555556
									9643	fish and seafood, tuna, cooked from fresh or frozen, skipjack	117	0.63	0	0	0.0833333									9643	fish and seafood, tuna, cooked from fresh or frozen, skipjack	117	0.63	0	0	0.0833333		0.0833333
									9067	fish and seafood, bonito, cooked from fresh or frozen	117	0.63	0	0	0.0833333									9067	fish and seafood, bonito, cooked from fresh or frozen	117	0.63	0	0	0.0833333		0.0833333
Cephalopods	Default composition: 1570 Cephlp Fresh, 1571 Cphlp Frozen, 1572 Cphlp Cured, 1573 Cphlp Canned, 1574 Cphlp Pr nes, 1575 Cphlp Meals	2766			Cephalopods					Cephalopods	124.667	2.29333	0	0	1			Cephalopods	115	2.17	0	0		NDSR	Cephalopods	124.667	2.29333	0				1		IML composite category of unknown composition; NDSR Zn values similar to USDA, with additional corrections for raw vs. cooked values; used NDSR Zn values for all fish/aquatic species	Assume phytate =0 for all animal source foods
									9613	fish and seafood, squid, cooked from fresh or frozen	105	1.76	0	0	0.333333									9613	fish and seafood, squid, cooked from fresh or frozen	105	1.76	0				0.333333
									9226	fish and seafood, octopus, cooked from fresh or frozen	164	3.36	0	0	0.333333									9226	fish and seafood, octopus, cooked from fresh or frozen	164	3.36	0				0.333333
									11359	fish and seafood, cuttle fish	105	1.76	0	0	0.333333									11359	fish and seafood, cuttle fish	105	1.76	0				0.333333
Crustaceans	Default composition: 1553 Crstaceans F, 1554 Crstc Frozen, 1555 Crstc Cured, 1556 Crstc Canned, 1557 Crstc Pr nes, 1558 Crstc Meals	2765			Crustaceans					Crustaceans	96.6	2.936	0	0	1			Crustaceans	88.5	2.8425	0	0			Crustaceans	96.6	2.936	0				1		IML composite category of unknown composition; NDSR Zn values similar to USDA, with additional corrections for raw vs. cooked values; used NDSR Zn values for all fish/aquatic species	Assume phytate =0 for all animal source foods
									9102	fish and seafood, crab, hardshell, Blue	102	4.22	0	0	0.2									9102	fish and seafood, crab, hardshell, Blue	102	4.22	0				0.2
									9112	fish and seafood, crayfish (crawfish)	82	1.76	0	0	0.2									9112	fish and seafood, crayfish (crawfish)	82	1.76	0				0.2
									9185	fish and seafood, lobster, cooked from fresh or frozen	98	2.92	0	0	0.2									9185	fish and seafood, lobster, cooked from fresh or frozen	98	2.92	0				0.2
									9595	fish and seafood, shrimp, cooked from fresh or frozen	99	1.56	0	0	0.2									9595	fish and seafood, shrimp, cooked from fresh or frozen	99	1.56	0				0.2
									9101	fish and seafood, crab, hardshell, Alaskan King	102	4.22	0	0	0.2									9101	fish and seafood, crab, hardshell, Alaskan King	102	4.22	0				0.2
Molluscs, Other	Default composition: 1562 Mlluscs Frsh, 1563 Molsc Frozen, 1564 Molsc Cured, 1565 Molsc Canned, 1566 Molsc Meals	2767			Molluscs, other					Molluscs, other	128.75	2.64	0	0	1			Molluscs, other	117	1.5175	0	0		NDSR	Molluscs, other	128.75	2.64	0			0	1		IML composite category of unknown composition; NDSR Zn values similar to USDA, with additional corrections for raw vs. cooked values; used NDSR Zn values for all fish/aquatic species; excluded oysters from all database composites	Assume phytate =0 for all animal source foods
									17302	fish and seafood, abalone, cooked from fresh or frozen	107	2.1	0	0	0.25									17302	fish and seafood, abalone, cooked from fresh or frozen	107	2.1	0				0.25
									9093	fish and seafood, clams, cooked from fresh or frozen	148	2.73	0	0	0.25									9093	fish and seafood, clams, cooked from fresh or frozen	148	2.73	0				0.25
									9220	fish and seafood, mussel, cooked from fresh or frozen	148	2.73	0	0	0.25									9220	fish and seafood, mussel, cooked from fresh or frozen	148	2.73	0				0.25
									9467	fish and seafood, scallops	112	3	0	0	0.25									9467	fish and seafood, scallops	112	3	0				0.25
Meat, Aquatic Mammals	Default composition: 1580 Aq M Meat, 1583 Aq M Prep Ns	2768			Meat, aquatic mammals					Meat, Aquatic Mammals	138.5	3.05	0	0	1			Meat, Aquatic Mammals						NDSR	Meat, Aquatic Mammals	138.5	3.05	0				1		Not included in IML (Wuehler 2005); NDSR Zn values similar to USDA, with additional corrections for raw vs. cooked values; used NDSR Zn values for all fish/aquatic species	Assume phytate =0 for all animal source foods
									20585	game, Alaska Native, whale, meat, cooked (bowhead)	135	3	0	0	0.5									20585	game, Alaska Native, whale, meat, cooked (bowhead)	135	3	0				0.5
									20580	game, Alaska Native, seal, ringed, meat	142	3.1	0	0	0.5									20580	game, Alaska Native, seal, ringed, meat	142	3.1	0				0.5
Aquatic Animals, Others	Default composition: 1587 Aqutc Anim F, 1588 Aq A Cured, 1589 Aquatic Animals Meals, 1590 Aq A Prep Ns	2769			Aquatic Animals, others					Aquatic animals, others	108.667	0.843333	0	0	1			Aquatic animals (beef)	269	4.1	0	0		NDSR	Aquatic animals, others	108.667	0.843333	0			1	1		IML (Wuehler 2005) useds bovine meat Zn values as substitute; NDSR Zn values similar to USDA, with additional corrections for raw vs. cooked values; used NDSR Zn values for all fish/aquatic species	Assume phytate =0 for all animal source foods
									28895	game, alligator	92	1.27	0	0	0.333333									28895	game, alligator	92	1.27	0				0.333333
									9148	fish and seafood, frog legs	117	0.63	0	0	0.333333									9148	fish and seafood, frog legs	117	0.63	0				0.333333
									10010	fish and seafood, turtle, cooked from fresh or frozen	117	0.63	0	0	0.333333									10010	fish and seafood, turtle, cooked from fresh or frozen	117	0.63	0				0.333333
Aquatic Plants	Default composition: 1594 Aquatic plants, fresh, 1595 Aquatic plants, dried, 1596 Aquatic plants, other preparations	2775			Aquatic plants	37.3333	0.898333		21621	vegetables, seaweed, kelp	43	1.23	97	7.81449	1			SEAWEED, KELP, RAW (SEAGIRDLE);SEAWEED, LAVER, RAW (NORI)	39	1.15	97	8.3581		USDA (11442, 11444, 11445, 11446, 11666, 11669)	Aquatic plants	37.3	0.9	97			10.6798	1		used USDA Zn values	IML phytate values are imputed from okra leaf; NDSR did not have phytate data (imputed from IML)
				11442	Seaweed, agar, raw	26	0.58																	11445	Seaweed, kelp, raw	43	1.23					0.166667
				11444	Seaweed, irishmoss, raw	49	1.95																	11446	Seaweed, laver, raw	35	1.05					0.166667
				11445	Seaweed, kelp, raw	43	1.23																	11666	Seaweed, spirulina, raw	26	0.2					0.166667
				11446	Seaweed, laver, raw	35	1.05																	11669	Seaweed, wakame, raw	45	0.38					0.166667
				11666	Seaweed, spirulina, raw	26	0.2																	11442	Seaweed, agar, raw	26	0.58					0.166667
				11669	Seaweed, wakame, raw	45	0.38																	11444	Seaweed, irishmoss, raw	49	1.95					0.166667
Fish, Body Oil	Default composition: 1509 Frwt Bdy Oil, 1522 Dmrs Bdy Oil, 1535 Pelg Bdy Oil, 1548 Marn Bdy Oil, 1582 Aq M Oils	2781		04590	FISH OIL,HERRING	902	0			Fish, body oil	902	0	0		1		USDA 4593	Fish oil, salmon	902	0	0			04590 USDA	FISH OIL,HERRING	902	0	0				1		used USDA Zn values	Assume phytate =0 for all animal source foods
									18423	supplements - vitamins, minerals and miscellaneous, herring oil	902	0	0		0.5
									18424	supplements - vitamins, minerals and miscellaneous, sardine oil	902	0	0		0.5
Fish, Liver Oil	Default composition: 1510 Frwt Lvr Oil, 1523 Demersal Liver Oils, 1536 Pelg Lvr Oil, 1549 Marine nes Liver Oils	2782		04589	FISH OIL,COD LIVER	902	0		12366	supplements - vitamins, minerals and miscellaneous, cod liver oil	902	0	0		1		WFOOD 753	Fish oil, cod liver	900	0	0			04589 USDA	FISH OIL,COD LIVER	902	0	0				1		used USDA Zn values	Assume phytate =0 for all animal source foods
Rice (Milled Equivalent)	Default composition: 27 Rice, paddy, 28 Rice Husked, 29 Milled/Husked Rice, 31 Rice Milled, 32 Rice Broken, 34 Starch of Rice, 38 Rice Flour; nutrient data only: 33 Rice gluten, 35 Bran of Rice	2805			Rice (milled equivalent)	361	1.11667		1903	ingredient, rice - uncooked, white	368.954	1.391	144.744	10.3112	1		7200	rice (milled equivalent)	130	0.4	126	31.2136		USDA 20444/20450/20452	Rice, white, raw, unenriched, long-, medium-, short-grain average	361	1.11667	226	258		20.0548	1		NDSR Zn value matches USDA 20545 (once adjusted for cooking; however, Zn values/ kcal for cooked vs. raw are different for long grain but not for any of the other types of rice). Rice is currently listed as uncooked (similar to cereals); used USDA data (composite of 3 varieties)	IML phytate value from Reddy et al. 1989 (adjusted for cooked); Mean of Midpoints for Reddy 2002 for long-, medium- and short-grain rice = 258.3mg/100g * DM content of each = 225.8 mg/100g fresh weight; does not make adjustment for losses due to cooking.	India (8 commerical varieties), Zn= 0.7 - 1.9mg/100g,; Arsenault, J Nutr 2010, Zn= 0.76 - 0.92mg/100g raw weight; Liang, J Cer Sci 2008, Zn=1.5-2.1mg/100g, 180s milling time "white rice" ; Masironi, The Science of the Total Environment 1977, 100 polished rice varieties by country, Zn=USA 1.2mg/100g, Taiwan 1.2mg/100g, Yemen 1.2mg/100g, Bangladesh 1.1mg/100g, Philippines 1.3mg/100g, Singapore 1.4m…	Arsenault, J Nutr 2010, Phytate= 121mg/100g raw weight ; Liang, J Cer Sci 2008, Phytate =70-120mg/100g, 180s milling time 'white rice'; Hunt, J Agric Food Chem 2002, P:ZN ratio = 4, Phytate=65mg/100g; Chan, J Food Comp Anal 2007, Phytate= 242mg/100gDM raw, 87-121mg/100g DM boiled (IP5 & IP6); Karunaratne, J Food Comp Anal 2008, Zn=110-320mg/100g DM raw , 27-308mg/100gDM parboiled ; Mbofung, Nut R…
				20452	RICE,WHITE,SHORT-GRAIN,RAW,UNENR	358	1.1																	20452	RICE,WHITE,SHORT-GRAIN,RAW,UNENR	358	1.1					0.333333
				20450	RICE,WHITE,MEDIUM-GRAIN,RAW,UNENR	360	1.16																	20450	RICE,WHITE,MEDIUM-GRAIN,RAW,UNENR	360	1.16					0.333333
				20444	RICE,WHITE,LONG-GRAIN,RAW,UNENR	365	1.09																	20444	RICE,WHITE,LONG-GRAIN,RAW,UNENR	365	1.09					0.333333
				20545	RICE,WHITE,LONG-GRAIN,REG,CKD,UNENR, W/SALT	130	0.49
